# Supplementary material for: Impact of anion polarizability on ion pairing in microhydrated salt clusters
Source: Royal Society of Chemistry journal article supplement (doi:10.1039/d2sc03431j), 2022-01-01
Supplement: d2sc03431j1.pdf [file d2sc03431j1.pdf]

## Supplementary Information

### **Impact of Anion Polarizability on Ion Pairing in Microhydrated Salt Clusters**

*Arghya Chakraborty,<sup>a</sup> Thomas Brumme,<sup>a,c</sup> Sonja Schmahl,<sup>a</sup> Hendrik Weiske,<sup>a</sup> Carsten Baldauf<sup>b†</sup>*

*and Knut R. Asmis<sup>a†</sup>*

<sup>a</sup> *Wilhelm-Ostwald-Institut für Physikalische und Theoretische Chemie, Universität Leipzig,  
Linnéstrasse 2, D-04103 Leipzig, Germany*

<sup>b</sup> *Abteilung Theorie, Fritz-Haber-Institut der Max-Planck-Gesellschaft, Berlin, Germany*

<sup>c</sup> *Theoretische Chemie, Technische Universität Dresden, Dresden, Germany*

<sup>†</sup> *Corresponding authors: baldauf@fhi-berlin.mpg.de, knut.asmis@uni-leipzig.de*

| <b>Table of Contents</b>                                                                                                                                                                                          | <b>Page</b> |
|-------------------------------------------------------------------------------------------------------------------------------------------------------------------------------------------------------------------|-------------|
| <b>Table S1:</b> List of IRPD band frequencies and mode assignments                                                                                                                                               | 3-4         |
| <b>Figure S1:</b> D <sub>2</sub> vs. H <sub>2</sub> O-loss IRPD traces for [LiI <sub>2</sub> (H <sub>2</sub> O) <sub>n</sub> ] <sup>-</sup> and [LiCl <sub>2</sub> (H <sub>2</sub> O) <sub>n</sub> ] <sup>-</sup> | 5           |
| <b>Figure S2:</b> IRPD spectral comparison: [LiI <sub>2</sub> (H <sub>2</sub> O) <sub>3</sub> ] <sup>-</sup> , [Li(H <sub>2</sub> O) <sub>3</sub> ] <sup>+</sup> and [I(H <sub>2</sub> O)] <sup>-</sup>           | 6           |
| <b>Figure S3.</b> IRPD vs IR <sup>2</sup> MS <sup>2</sup> spectra of [LiXX'(H <sub>2</sub> O) <sub>3</sub> ] <sup>-</sup> (XX' = Cl <sub>2</sub> , ClI and I <sub>2</sub> )                                       | 7           |
| <b>Figure S4.</b> Minimum-energy structures of [LiI <sub>2</sub> (H <sub>2</sub> O) <sub>n</sub> ] <sup>-</sup> (n = 1-3) Isomers                                                                                 | 8           |
| <b>Figure S5.</b> Minimum-energy structures of [LiClI(H <sub>2</sub> O) <sub>n</sub> ] <sup>-</sup> (n = 1-3) Isomers                                                                                             | 9           |
| <b>Figure S6.</b> Minimum-energy structures of [LiCl <sub>2</sub> (H <sub>2</sub> O) <sub>n</sub> ] <sup>-</sup> (n = 1-3) Isomers                                                                                | 10          |
| <b>Figure S7.</b> Quadrupole mass spectrum of [LiI <sub>2</sub> (H <sub>2</sub> O) <sub>n</sub> ] <sup>-</sup>                                                                                                    | 11          |
| <b>Figure S8.</b> Quadrupole mass spectrum of [LiClI(H <sub>2</sub> O) <sub>n</sub> ] <sup>-</sup>                                                                                                                | 12          |
| <b>Figure S9.</b> Quadrupole mass spectrum of [LiCl <sub>2</sub> (H <sub>2</sub> O) <sub>n</sub> ] <sup>-</sup>                                                                                                   | 13          |
| <b>Figure S10.</b> Calculated H <sub>2</sub> O Binding energies for [LiXX'(H <sub>2</sub> O) <sub>1-3</sub> ] <sup>-</sup>                                                                                        | 14          |
| <b>Figure S11.</b> Calculated spectra MP2/6-311++G(2df,2pd) vs. MP2/ def2TZVP                                                                                                                                     | 15          |
| <b>Fig S12.</b> Potential energy surface scan: <b>3.3.0a</b> and <b>3.2.1a</b> of [LiI <sub>2</sub> (H <sub>2</sub> O) <sub>3</sub> ] <sup>-</sup>                                                                | 16          |
| <b>Fig S13.</b> Potential energy surface scan: <b>3.2.1a</b> and <b>3.2.1b</b> of [LiClI(H <sub>2</sub> O) <sub>3</sub> ] <sup>-</sup>                                                                            | 17          |
| <b>Fig S14.</b> Potential energy surface scan: <b>3.2.1a</b> and <b>3.2.1b</b> of [LiCl <sub>2</sub> (H <sub>2</sub> O) <sub>3</sub> ] <sup>-</sup>                                                               | 18          |
| <b>Fig S15.</b> IR <sup>2</sup> MS <sup>2</sup> vs AIMD for [LiCl <sub>2</sub> (H <sub>2</sub> O) <sub>3</sub> ] <sup>-</sup>                                                                                     | 19          |
| <b>Table S2a.</b> ZPE-corrected relative energies, symmetry, structural details of low-energy isomers for [LiXX'(H <sub>2</sub> O) <sub>1-2</sub> ] <sup>-</sup> (XX' = I <sub>2</sub> , ClI, Cl <sub>2</sub> ).  | 20          |
| <b>Table S2b.</b> ZPE-corrected relative energies, symmetry, structural details of low-energy isomers for [LiXX'(H <sub>2</sub> O) <sub>3</sub> ] <sup>-</sup> (XX' = I <sub>2</sub> , ClI, Cl <sub>2</sub> ).    | 21          |
| <b>Table S4-5.</b> Cosine similarity score analysis                                                                                                                                                               | 22-23       |
| <b>Table S5-7.</b> Cartesian coordinates of MP2 minimum-energy structures [LiXX'(H <sub>2</sub> O) <sub>3</sub> ] <sup>-</sup> (XX' = Cl <sub>2</sub> , ClI and I <sub>2</sub> )                                  | 24-39       |
| Benchmark of the Dispersion Corrected XC-Functionals for the AIMD simulations                                                                                                                                     | 40          |
| <b>Figure S16.</b> Boxplot benchmark [LiCl <sub>2</sub> (H <sub>2</sub> O) <sub>3</sub> ] <sup>-</sup>                                                                                                            | 41          |
| <b>Figure S17.</b> Boxplot benchmark [LiI <sub>2</sub> (H <sub>2</sub> O) <sub>3</sub> ] <sup>-</sup>                                                                                                             | 41          |
| <b>Figure S18.</b> Boxplot benchmark [LiClI(H <sub>2</sub> O) <sub>3</sub> ] <sup>-</sup>                                                                                                                         | 42          |
| <b>References</b>                                                                                                                                                                                                 | 42-43       |

**Table S1.** IRPD band positions (in  $\text{cm}^{-1}$ ), anharmonic vibrational frequencies (in  $\text{cm}^{-1}$ ) and band assignments of  $\text{D}_2$ -tagged  $[\text{LiXX}'(\text{H}_2\text{O})_n]^-$  anions where  $\text{XX}'=\text{I}_2, \text{ClI}, \text{Cl}_2$  in the size range  $n = 1-3$ . Detailed comparison between  $\text{IR}^2\text{MS}^2$  and calculated wavenumbers for  $[\text{LiCl}_2(\text{H}_2\text{O})_{1-3}]^-$  are available in reference 1. “Dash” has been used where descriptions of the modes are not available.

| Label                                      | IRPD          | $\nu_{\text{Anh.}}$ | Assignments                               | Label                     | IRPD         | $\nu_{\text{Anh.}}$ | Assignments                                      | Label                     | IRPD                 | Assignments                                         |
|--------------------------------------------|---------------|---------------------|-------------------------------------------|---------------------------|--------------|---------------------|--------------------------------------------------|---------------------------|----------------------|-----------------------------------------------------|
| <b><math>\text{XX}'=\text{I}_2</math></b>  |               |                     |                                           |                           |              |                     |                                                  |                           |                      |                                                     |
| <b><math>n = 1</math></b>                  | <b>1.0.0d</b> |                     |                                           | <b><math>n = 2</math></b> | <b>2.2.0</b> |                     |                                                  | <b><math>n = 3</math></b> | <b>3.3.0a/b-321a</b> |                                                     |
| a <sub>1</sub>                             | 3652          | 3660                | $\nu_{\text{as}}(\text{DD-H}_2\text{O})$  | b <sub>1</sub>            | 3724         | 3718                | $\nu_{\text{free}}(\text{D-H}_2\text{O})$        | c <sub>1</sub>            | 3679                 | -                                                   |
| a <sub>2</sub>                             | 3503          | 3505                | combination                               | b <sub>2</sub>            | 3361         |                     |                                                  | c <sub>2</sub>            | 3624                 | -                                                   |
| a <sub>3</sub>                             | 3444          | 3438                | $\nu_{\text{s}}(\text{DD-H}_2\text{O})$   | b <sub>3</sub>            | 3297         | 3290                | combination                                      | c <sub>3</sub>            | 3599                 | -                                                   |
| *                                          | 2967          |                     | D <sub>2</sub> stretch                    | b <sub>4</sub>            | 3235         | 3194                | $\nu_{\text{s}}(\text{D-H}_2\text{O}'\text{s})$  | c <sub>4</sub>            | 3450                 | -                                                   |
|                                            |               |                     |                                           | b <sub>5</sub>            | 3211         | 3170                | combination                                      | c <sub>5</sub>            | 3394                 | -                                                   |
|                                            |               |                     |                                           | b <sub>6</sub>            | 3186         | 3146                | combination                                      | c <sub>6</sub>            | 3377                 | -                                                   |
|                                            |               |                     |                                           | *                         | 3152         | 3100                | $\nu_{\text{as}}(\text{D-H}_2\text{O}'\text{s})$ | c <sub>7</sub>            | 3342                 | -                                                   |
|                                            |               |                     |                                           |                           | 2962         |                     | D <sub>2</sub> stretch                           | c <sub>8</sub>            | 3242                 | -                                                   |
|                                            |               |                     |                                           |                           |              |                     |                                                  | *                         | 2965                 | D <sub>2</sub> stretch                              |
| <b><math>\text{XX}'=\text{ClI}</math></b>  |               |                     |                                           |                           |              |                     |                                                  |                           |                      |                                                     |
| <b><math>n = 1</math></b>                  | <b>1.0.0c</b> |                     |                                           | <b><math>n = 2</math></b> | <b>2.2.0</b> |                     |                                                  | <b><math>n = 3</math></b> | <b>3.2.1a/b</b>      |                                                     |
| d <sub>1</sub>                             | 3681          | 3704                | $\nu_{\text{as}}(\text{D-H}_2\text{O})$   | e <sub>1</sub>            | 3720         | 3716                | $\nu_{\text{free}}(\text{D-H}_2\text{O})$        | f <sub>1</sub>            | 3712                 | -                                                   |
| d <sub>2</sub>                             | 3357          | 3272                | combination                               | e <sub>2</sub>            | 3381         |                     |                                                  | f <sub>2</sub>            | 3507                 | -                                                   |
| d <sub>3</sub>                             | 3293          | 3200                | $\nu_{\text{s}}(\text{D-H}_2\text{O})$    | e <sub>3</sub>            | 3306         | 3328                | combination                                      | f <sub>3</sub>            | 3366                 | -                                                   |
| *                                          | MPD           |                     |                                           | e <sub>4</sub>            | 3257         | 3224                | $\nu_{\text{s}}(\text{D-H}_2\text{O}'\text{s})$  | f <sub>4</sub>            | 3302                 | -                                                   |
|                                            |               |                     |                                           | e <sub>5</sub>            | 3216         | 3156                | combination                                      | f <sub>5</sub>            | 3220                 | -                                                   |
|                                            |               |                     |                                           | e <sub>6</sub>            | 3160         | 3124                | $\nu_{\text{as}}(\text{D-H}_2\text{O}'\text{s})$ | f <sub>6</sub>            | 3126                 | -                                                   |
|                                            |               |                     |                                           | *                         | 2947         |                     | D <sub>2</sub> stretch                           | *                         | 2962                 | D <sub>2</sub> stretch                              |
| <b><math>\text{XX}'=\text{Cl}_2</math></b> |               |                     |                                           |                           |              |                     |                                                  |                           |                      |                                                     |
| <b><math>n = 1</math></b>                  |               |                     |                                           | <b><math>n = 2</math></b> |              |                     |                                                  | <b><math>n = 3</math></b> |                      |                                                     |
| g <sub>1</sub>                             | 3709          | 1.0.0a              | $\nu_{\text{free}}(\text{D-H}_2\text{O})$ | h <sub>1</sub>            | 3729         | 2.2.0               | $\nu_{\text{free}}(\text{D-H}_2\text{O})$        | i <sub>1</sub>            | 3697<br>3661         | 3.2.1a<br>$\nu_{\text{free}}(\text{D-H}_2\text{O})$ |
| g <sub>2</sub>                             | 3616          | 1.0.0<br>b          | $\nu_{\text{as}}(\text{DD-H}_2\text{O})$  | h <sub>2</sub>            | 3535         | 2.0.1a              | $\nu_{\text{as}}(\text{DD-H}_2\text{O})$         | i <sub>2</sub>            | 3576                 | 3.0.2<br>$\nu_{\text{as}}(\text{DD-H}_2\text{O})$   |

|                |      |            |                                      |                |      |        |                                              |                 |      |        |                                        |
|----------------|------|------------|--------------------------------------|----------------|------|--------|----------------------------------------------|-----------------|------|--------|----------------------------------------|
| g <sub>3</sub> | 3567 | 1.0.0<br>b | combination                          | h <sub>3</sub> | 3394 | 2.0.1a | v <sub>s</sub> (DD-H <sub>2</sub> O)         | i <sub>3</sub>  | 3531 | 3.0.2  | v <sub>as</sub> (DD-H <sub>2</sub> O)  |
| g <sub>4</sub> | 3529 | 1.0.0<br>b | v <sub>s</sub> (DD-H <sub>2</sub> O) | h <sub>4</sub> | 3265 | 2.2.0  | bend overtone                                | i <sub>4</sub>  | 3508 | 3.0.2  | v <sub>as</sub> (ADD-H <sub>2</sub> O) |
| g <sub>5</sub> | 3444 | 1.0.0a     | v <sub>HB</sub> (D-H <sub>2</sub> O) | h <sub>5</sub> | 3203 | 2.2.0  | combination                                  | i <sub>5</sub>  | 3443 | 3.0.2  | v <sub>s</sub> (ADD-H <sub>2</sub> O)  |
| g <sub>6</sub> | 3246 | 1.0.0a     | bend<br>overtone                     | h <sub>6</sub> | 3157 | 2.2.0  | combination                                  | i <sub>6</sub>  | 3351 | 3.0.2  | v <sub>s</sub> (DD-H <sub>2</sub> O)   |
| *              | 2959 |            | D2 stretch                           | h <sub>7</sub> | 3045 | 2.2.0  | combination                                  | i <sub>7</sub>  | 3312 | 3.2.1a | v <sub>s</sub> (AD-H <sub>2</sub> O)   |
|                |      |            |                                      | h <sub>8</sub> | 3014 | 2.2.0  | v <sub>s,HB</sub> (D-<br>H <sub>2</sub> O's) | i <sub>8</sub>  | 3227 |        | v <sub>s</sub> (DD-H <sub>2</sub> O)   |
|                |      |            |                                      | h <sub>9</sub> | 2960 | 2.2.0  | v <sub>as</sub> (D-H <sub>2</sub> O's)       | i <sub>9</sub>  | 3180 |        | v <sub>s</sub> (DD-H <sub>2</sub> O)   |
|                |      |            |                                      |                |      |        |                                              | i <sub>10</sub> | 3082 | 3.2.1  | combination                            |
|                |      |            |                                      |                |      |        |                                              | i <sub>11</sub> | 3019 | 3.2.1a | v <sub>s</sub> -D-H <sub>2</sub> O     |
|                |      |            |                                      |                |      |        |                                              | i <sub>12</sub> | 2878 | 3.2.1a | v <sub>s</sub> -D-H <sub>2</sub> O     |
|                |      |            |                                      |                |      |        |                                              | *               | 2957 |        | D2 stretch                             |

---

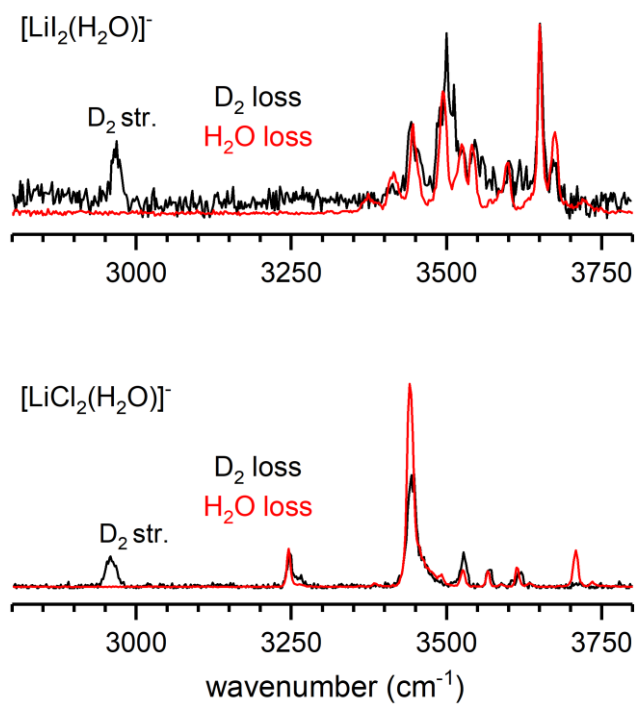

**Figure S1:** IRPD Spectra obtained by monitoring  $\text{D}_2$  (black) and  $\text{H}_2\text{O}$ -loss (red) for  $[\text{LiI}_2(\text{H}_2\text{O})]^-$  and  $[\text{LiCl}_2(\text{H}_2\text{O})]^-$  as shown in top and bottom panel, respectively. Bands due to  $\text{D}_2$  stretching mode are marked.

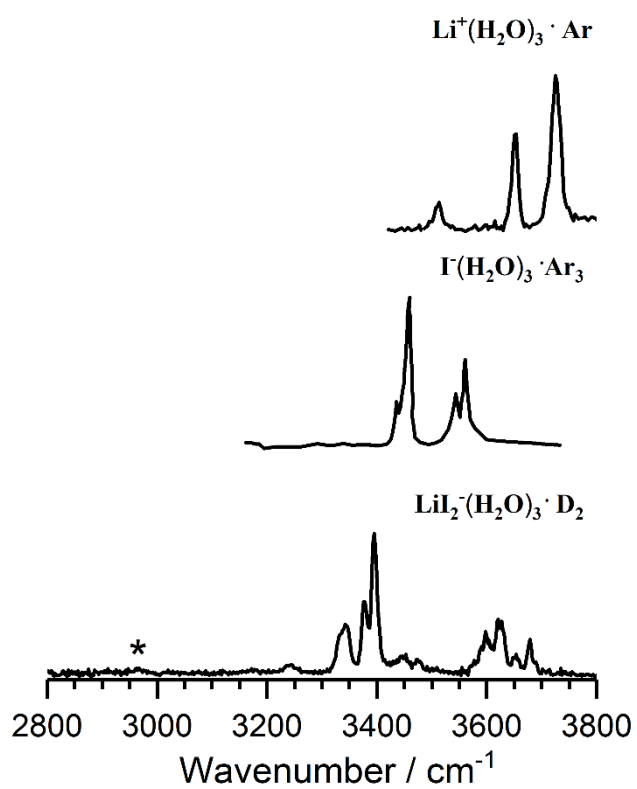

**Figure S2:** IRPD spectra obtained by monitoring D<sub>2</sub>-loss (bottom panel) for  $\text{Li}_2^-(\text{H}_2\text{O})_3^-$  and Ar-loss for  $\Gamma(\text{H}_2\text{O})_3$  (middle) and  $\text{Li}^+(\text{H}_2\text{O})_3$  (top).  $\text{Li}^+(\text{H}_2\text{O})_3$  and  $\Gamma(\text{H}_2\text{O})_3$  spectra are reproduced from previously published data.<sup>2,3</sup>

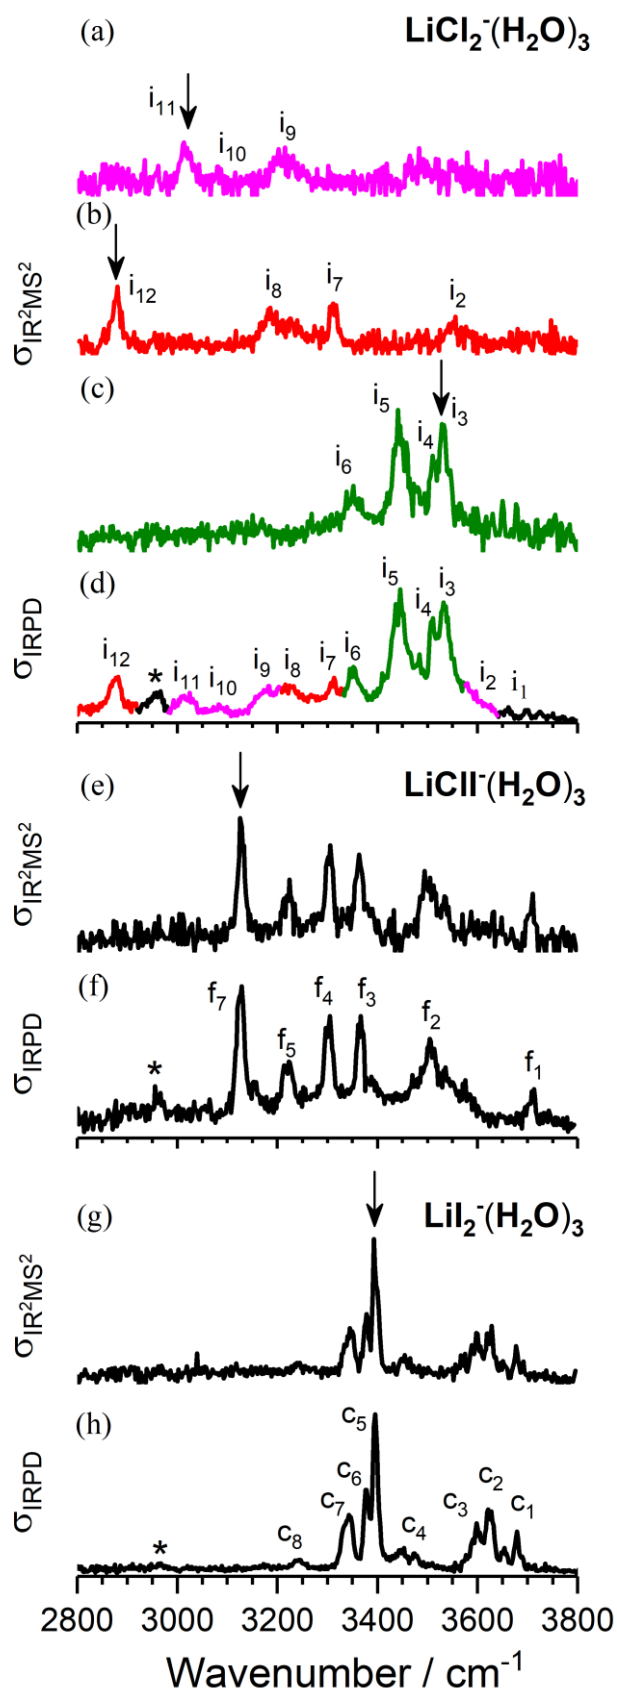

**Figure S3.** IRPD vs. IR<sup>2</sup>MS<sup>2</sup> spectra for [LiXX'(H<sub>2</sub>O)<sub>3</sub>]<sup>-</sup> where XX' = Cl<sub>2</sub> (trace a-d), ClI (e-f), and I<sub>2</sub> (g-h). Pump wavelengths for IR<sup>2</sup>MS<sup>2</sup> studies are assigned by arrows.

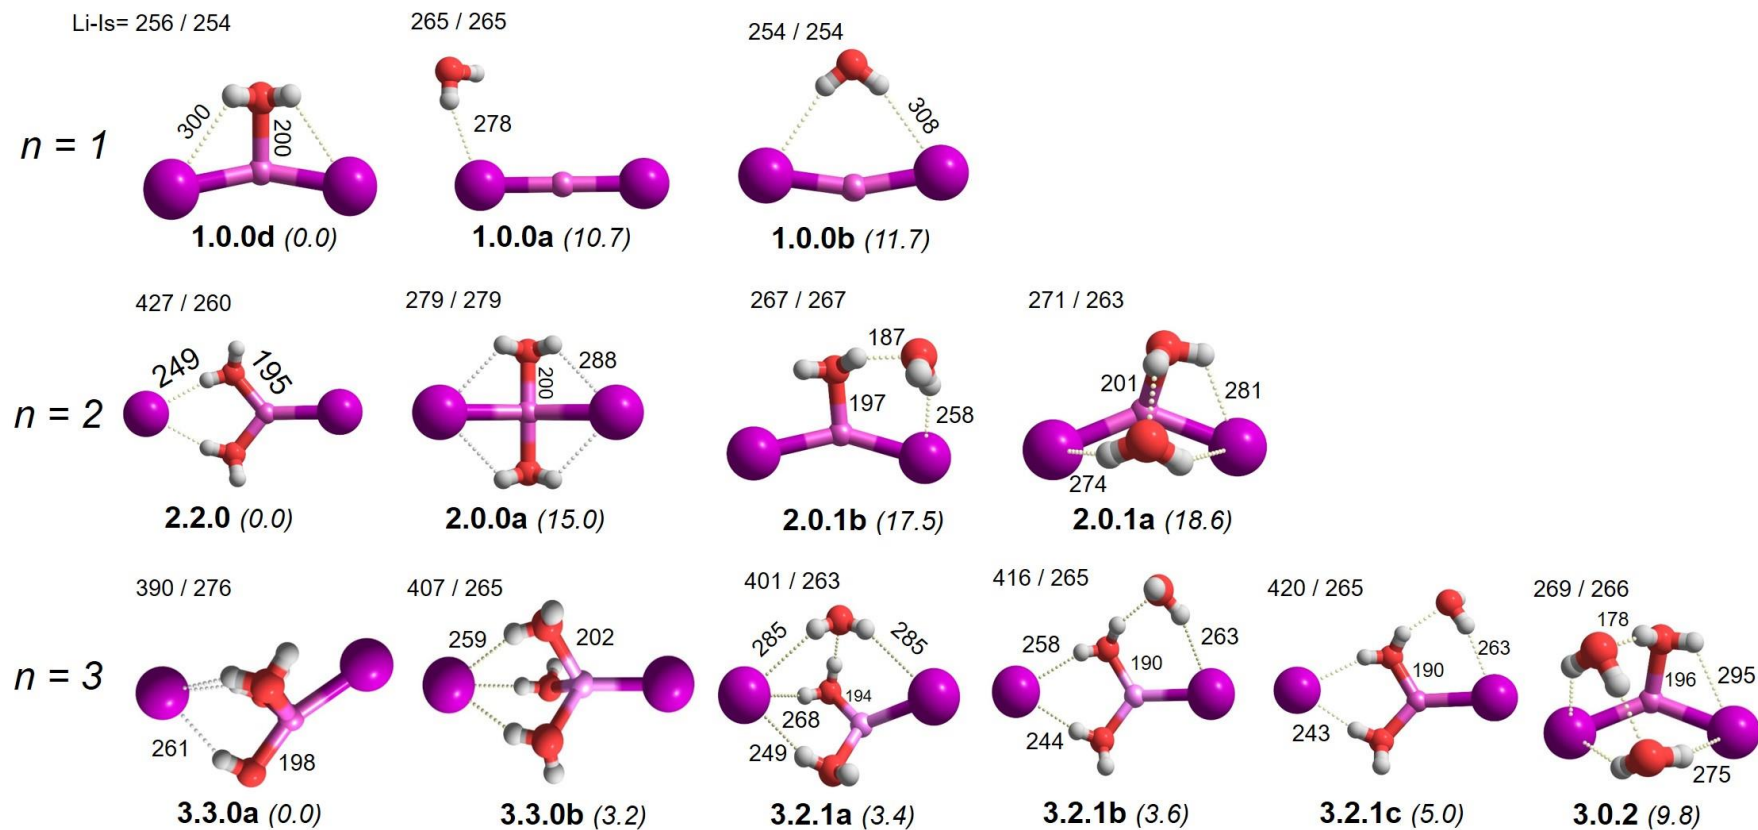

**Figure S4.** MP2/def2-TZVP structures of  $[\text{LiI}_2(\text{H}_2\text{O})_n]^-$  ( $n = 1-3$ ) along with ZPE corrected relative energies ( $\Delta E_{0,anh}$ ,  $\text{kJ mol}^{-1}$ ) and relevant bond distances (in pm).



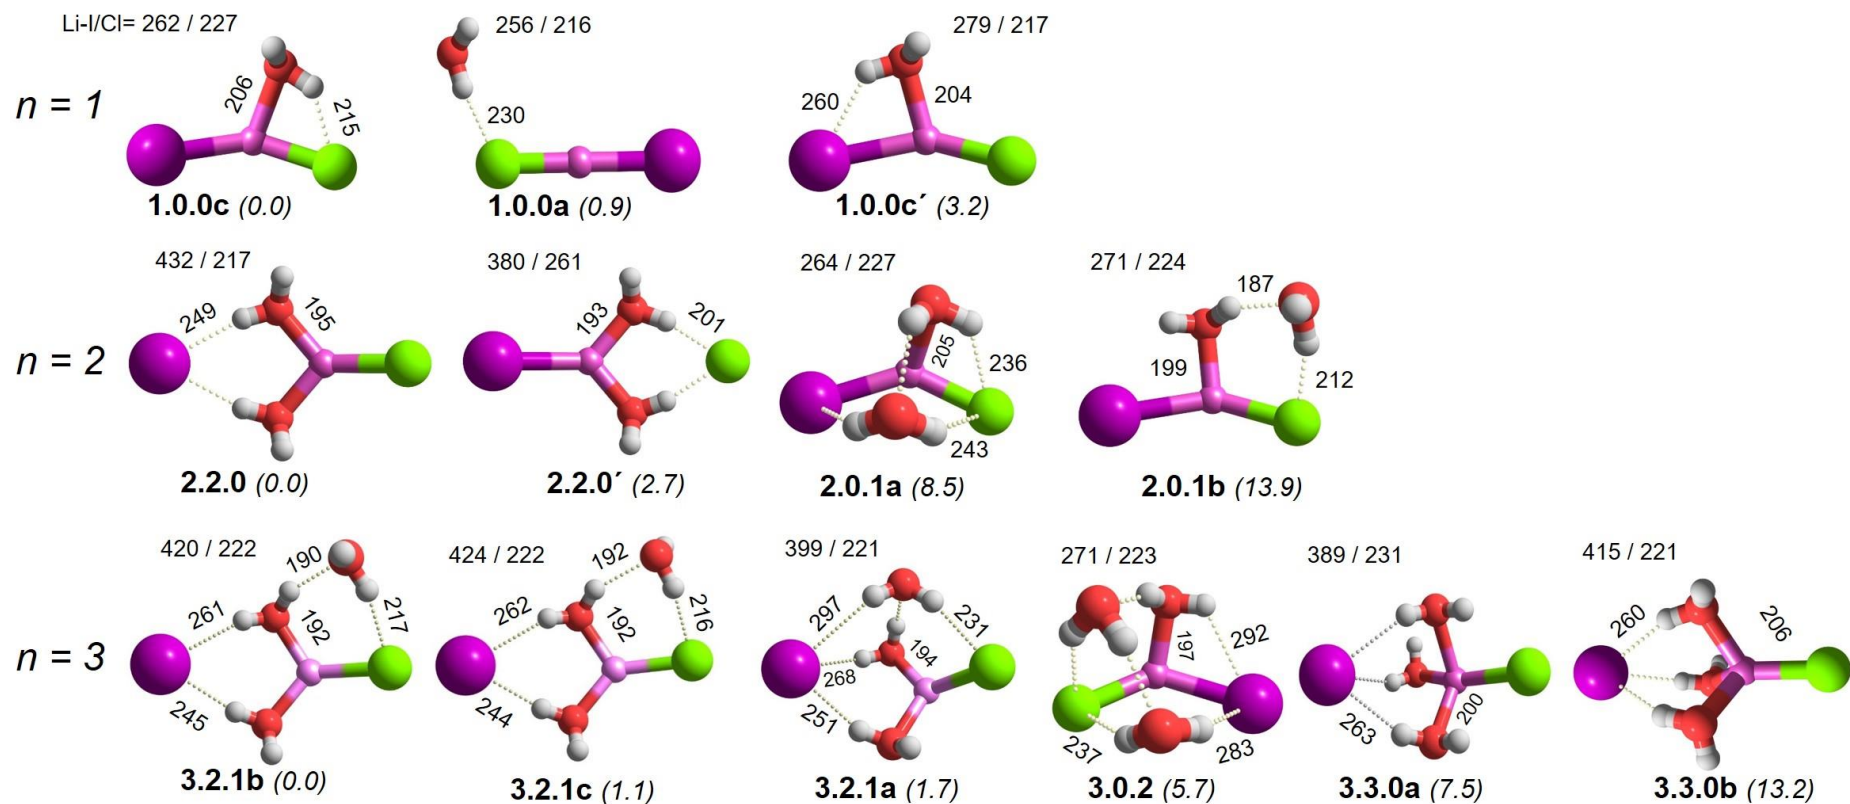

**Figure S5.** MP2 / def2TZVP structures of  $[\text{LiClI}(\text{H}_2\text{O})_n]^-$  ( $n = 1-3$ ) along with ZPE corrected relative energies ( $\Delta E_{0,anh}$ ,  $\text{kJ mol}^{-1}$ ) and relevant bond distances (in pm).

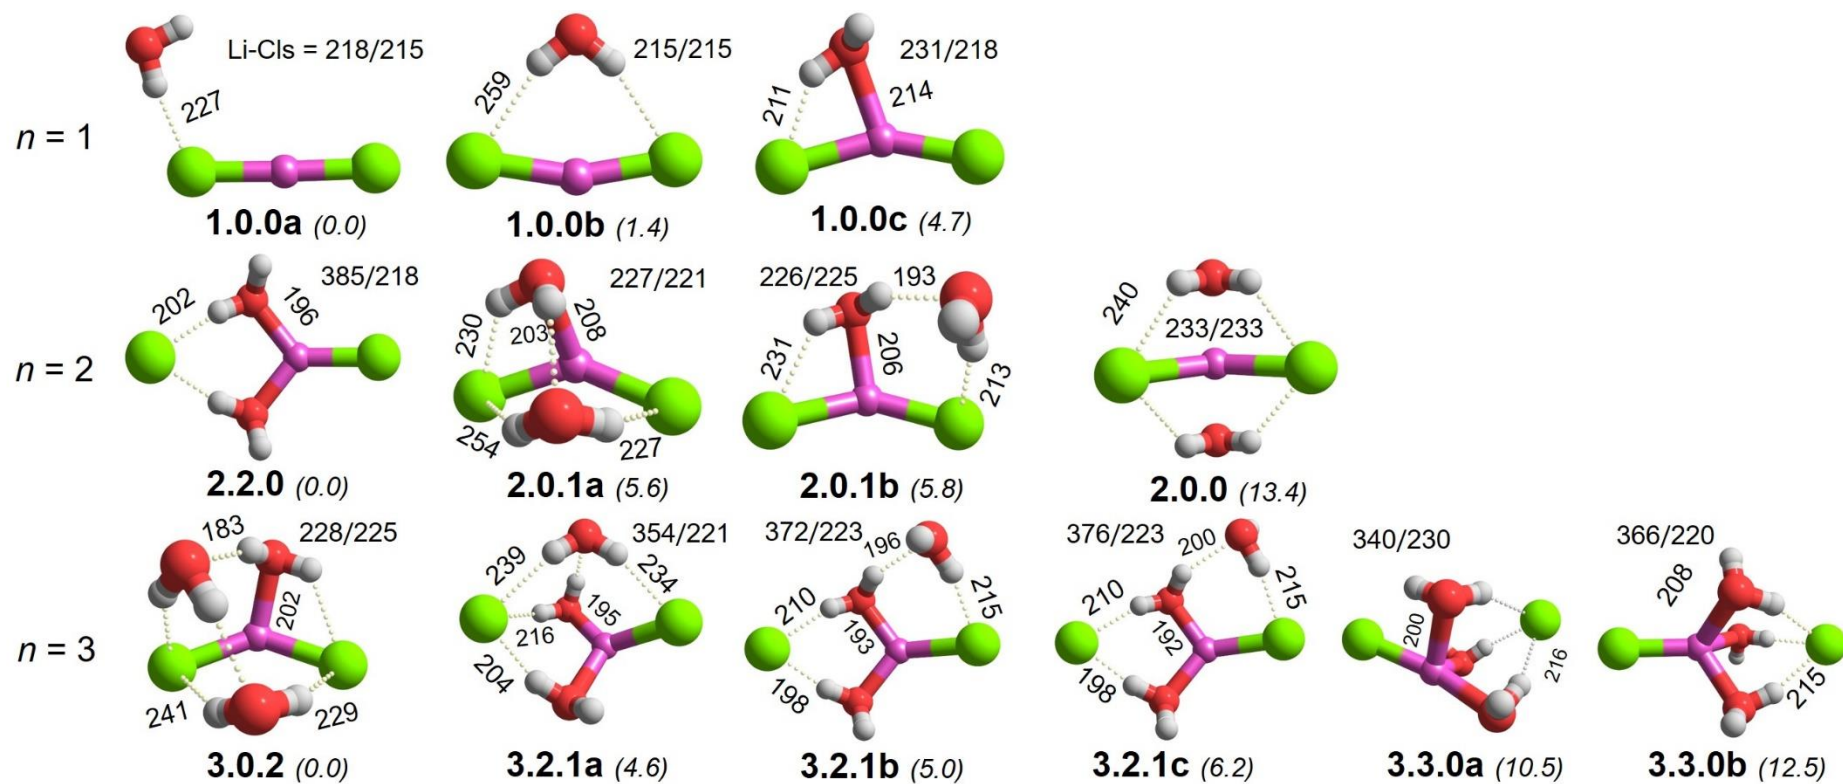

**Figure S6.** MP2 / def2TZVP structures of  $[\text{LiCl}_2(\text{H}_2\text{O})_n]^-$  ( $n = 1-3$ ) along with ZPE corrected relative energies ( $\Delta E_{0,anh}$ ,  $\text{kJ mol}^{-1}$ ) and relevant bond distances (in pm).

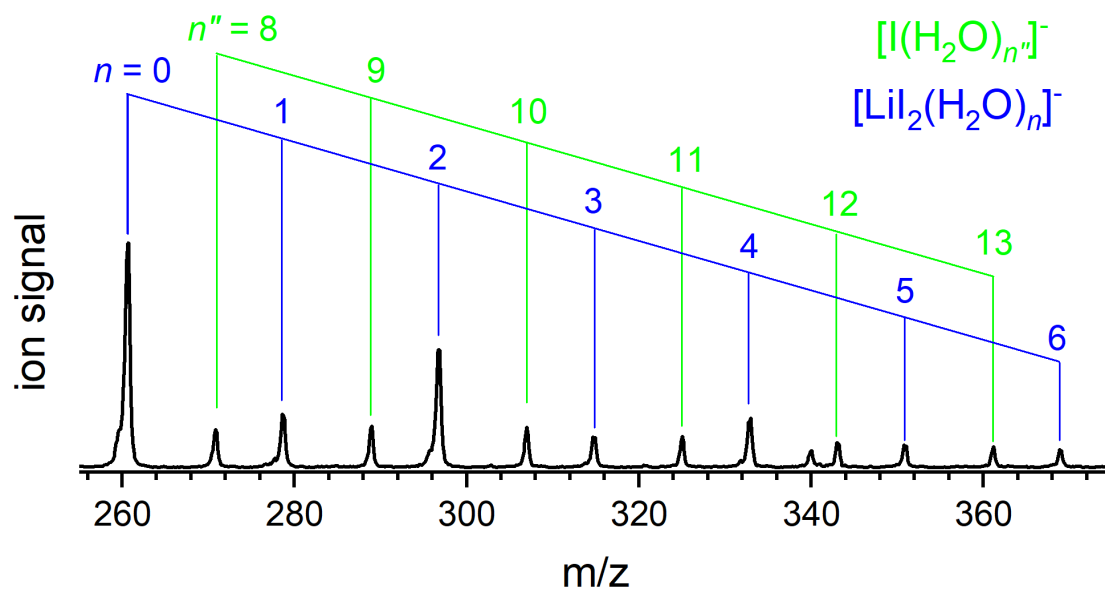

**Figure S7.** Quadrupole mass spectrum of microhydrated lithium diiodide  $[\text{LiI}_2^-(\text{H}_2\text{O})_n]$  and iodide anion  $[\text{I}^-(\text{H}_2\text{O})_{n''}]$  in the  $m/z$  range 255 to 375 amu obtained by ion spray of a 10 mM lithium iodide (LiI) in 1:1 water/acetonitrile solution.

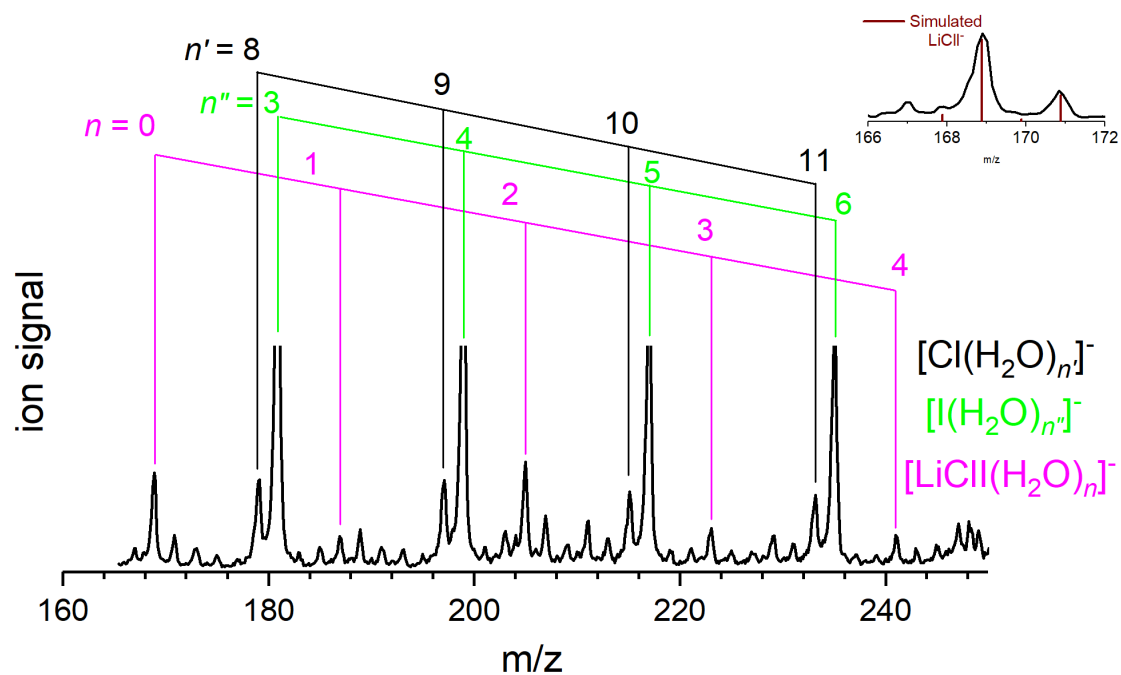

**Figure S8.** Quadrupole mass spectrum of microhydrated lithium chlorideiodide  $[\text{LiClI}(\text{H}_2\text{O})_n]^-$ , chloride  $[\text{Cl}(\text{H}_2\text{O})_n]^-$  and iodide  $[\text{I}(\text{H}_2\text{O})_{n''}]^-$  anions, in the  $m/z$  range 165 to 250 amu obtained by ion spray of a mixture of 10 mM lithium chloride (LiCl) and lithium iodide solution in 1:1 water/acetonitrile.  $\text{LiClI}^-$  reflects the natural isotropic distribution of constituting ions which has been affirmed in the inset comparing with simulated mass spectrum of  $\text{LiClI}^-$  (in red).

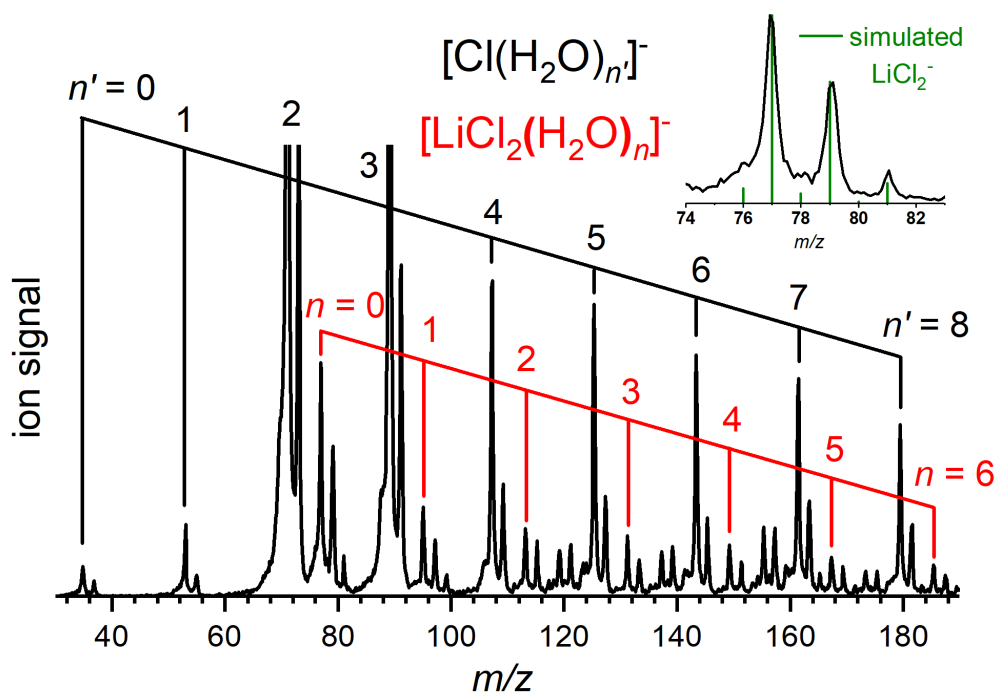

**Figure S9.** Quadrupole mass spectrum of microhydrated lithium dichloride  $[\text{LiCl}_2(\text{H}_2\text{O})_n]^-$  and chloride anions  $[\text{Cl}(\text{H}_2\text{O})_{n'}]^-$  in the  $m/z$  range up to 190 amu obtained by ion spray of a 10 mM lithium chloride (LiCl) in 1:1 water/acetonitrile solution. The observed doublets  $\text{Cl}^-$  and triplets  $\text{LiCl}_2^-$  reflect the natural isotropic distribution of lithium and chlorine. It has been affirmed in the inset comparing with simulated mass spectrum of  $\text{LiCl}_2^-$  (in green).

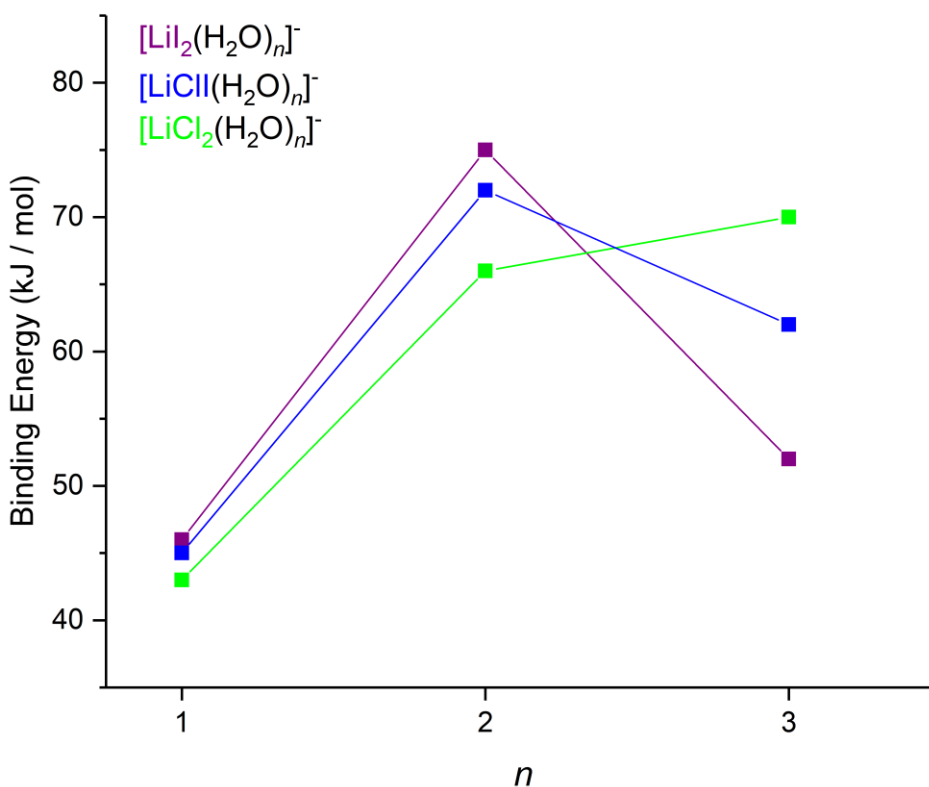

**Figure S10.** Calculated (MP2 / def2TZVP) sequential binding energies for each added water molecules to [LiXX']<sup>-</sup> anions where XX'=I<sub>2</sub>, ClI, Cl<sub>2</sub> in the size range  $n = 1-3$ .

In Figures S7 to S9 it can be seen that the relative intensities of [LiI<sub>2</sub>(H<sub>2</sub>O)<sub>2</sub>]<sup>-</sup> and [LiClI(H<sub>2</sub>O)<sub>2</sub>]<sup>-</sup> are higher in contrast to [LiCl<sub>2</sub>(H<sub>2</sub>O)<sub>2</sub>]<sup>-</sup>. This observation of “magic numbers” is indeed reflected in the stability of the corresponding complexes (see Figure S10). The sequential binding energy reaches a maximum at  $n = 2$  for LiI<sub>2</sub> and LiClI, while the highest value is observed at  $n = 3$  for LiCl<sub>2</sub>. The latter is a consequence of the stronger Li<sup>+</sup>-Cl<sup>-</sup> (vs. Li<sup>+</sup>-I<sup>-</sup>) as well as the stronger Cl<sup>-</sup>-water (vs. I<sup>-</sup>-water) interactions.

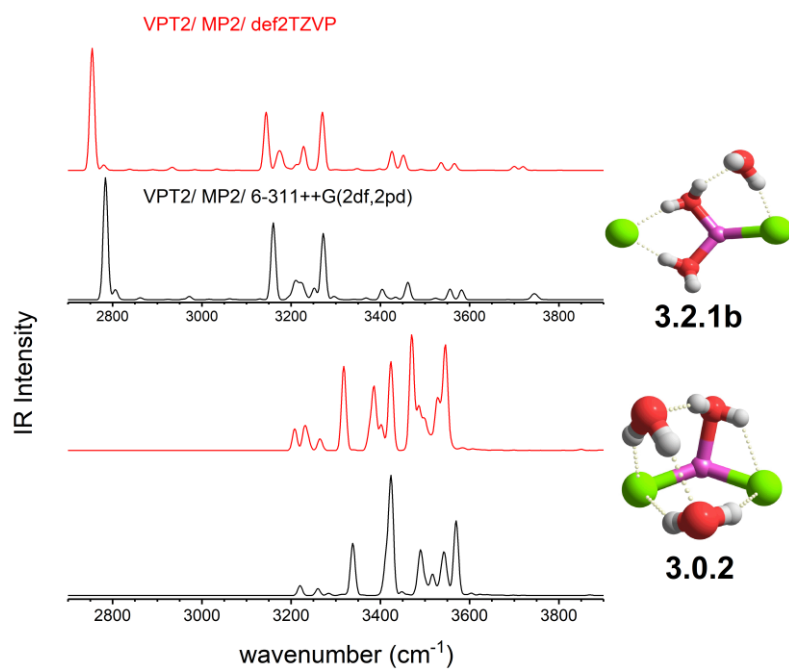

**Figure S11:** Comparison between anharmonic IR spectra of two individual structures of  $[\text{LiCl}_2(\text{H}_2\text{O})_3]^-$  anion, **3.0.2** and **3.2.1a**, calculated with MP2/6-311++G(2df,2pd) (in black) and MP2/ def2TZVP (in red).

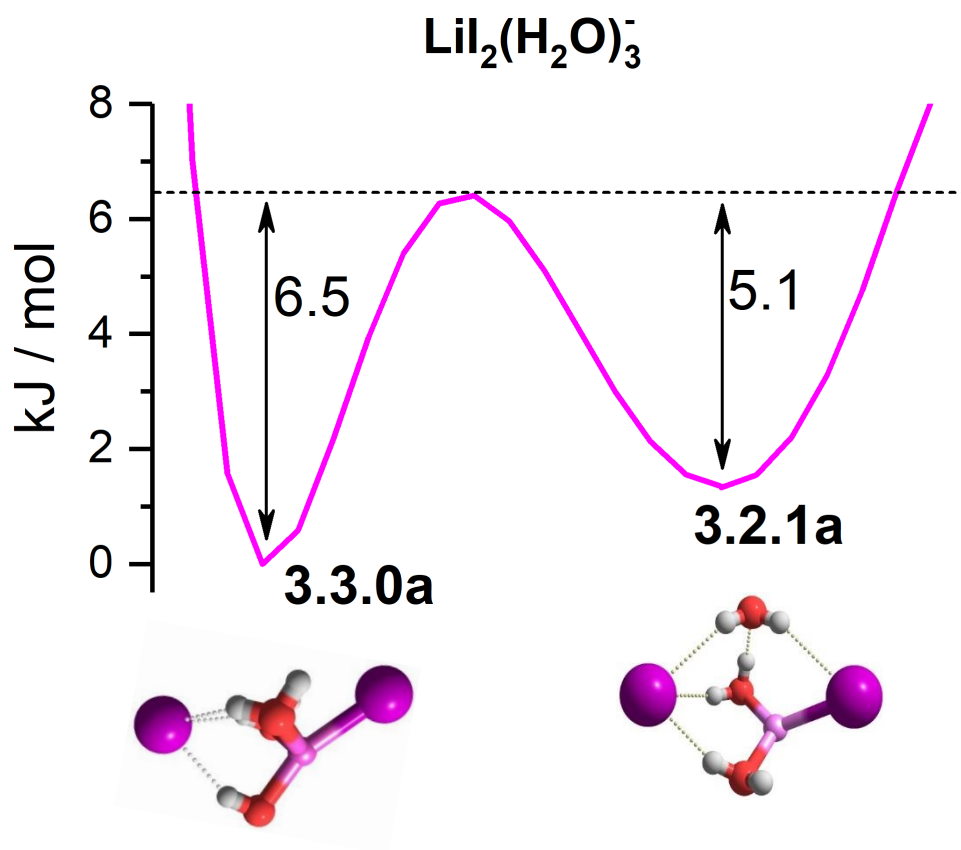

**Fig S12.** Potential energy surface scan at MP2 / def2TZVP exhibiting barrier height in kJ / mol for the interconversion between the structure **3.3.0a** and **3.2.1a** in case of  $[\text{LiI}_2(\text{H}_2\text{O})_3]^-$ .



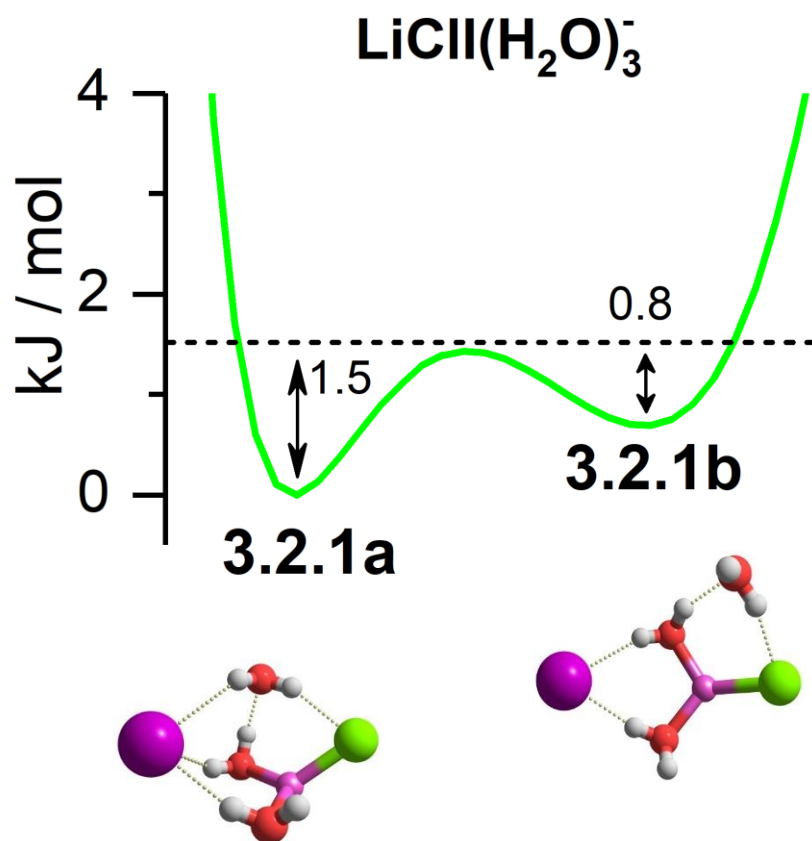

**Fig S13.** Potential energy surface scan at MP2 / def2TZVP exhibiting barrier height in  $\text{kJ/mol}$  for the interconversion between the structure 3.2.1a and 3.2.1b of  $[\text{LiClI}(\text{H}_2\text{O})_3]^-$ .

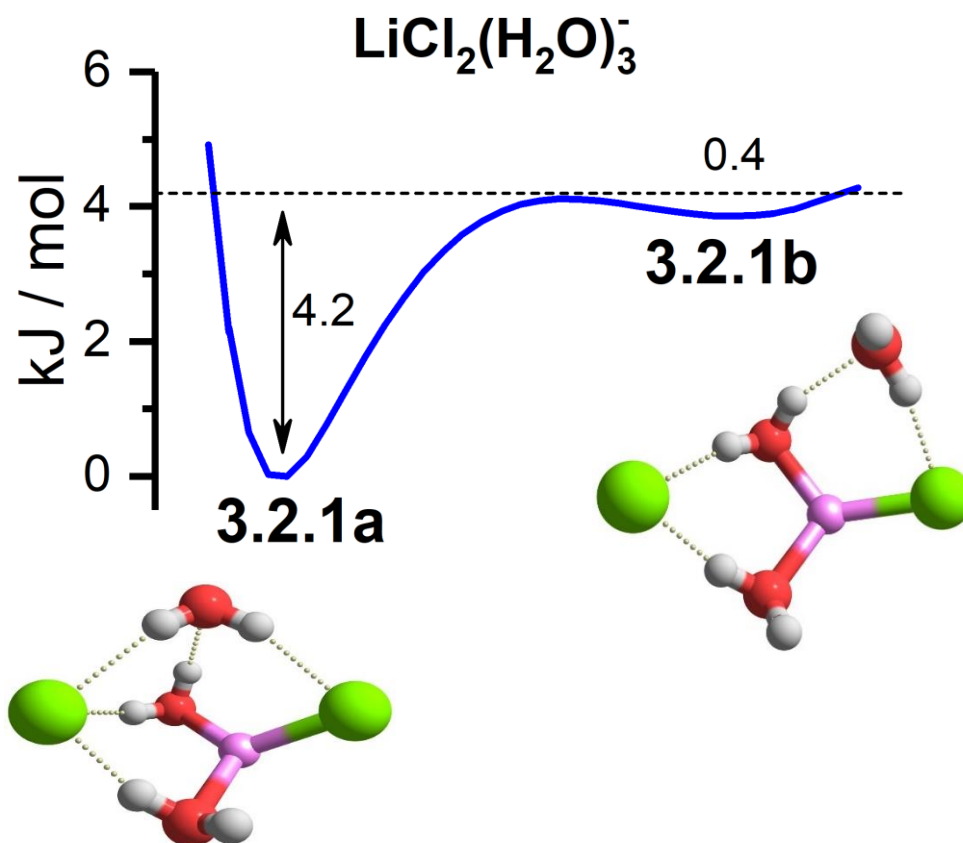

**Fig S14.** Potential energy surface scan at MP2/6-311++G(2df,2pd) exhibiting barrier height in  $\text{kJ/mol}$  for the interconversion between the structure **3.2.1a** and **3.2.1b** in case of  $[\text{LiCl}_2(\text{H}_2\text{O})_3]^-$ .

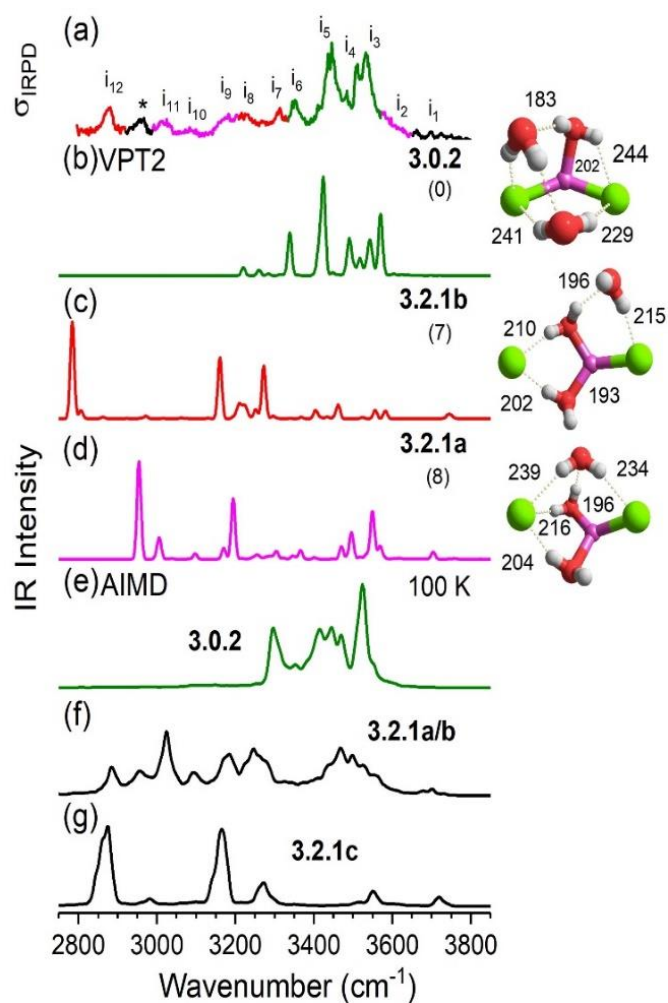

**Fig S15.** Comparison of the IRPD spectrum (trace a) of D<sub>2</sub>-tagged [LiCl<sub>2</sub>(H<sub>2</sub>O)<sub>3</sub>]<sup>-</sup> color coded as the contribution of multiple isomers determined with IR<sup>2</sup>MS<sup>2</sup> study (see Fig S3) probing at band i<sub>5</sub> (green), i<sub>11</sub> (pink) and i<sub>13</sub> (red) to the static anharmonic VPT2/MP2/6-311+G(2df,2pd) spectra of three most stable isomers **3.0.2** (c), **3.2.1a** (b) and **3.2.1b** (a), which has already been explain in our recent publication.<sup>1</sup> Additionally, the AIMD simulated dynamic anharmonic spectra at 100 K are compared in trace e, f and g.

**Table S2a.** ZPE-corrected relative energies  $\Delta E_{0,\text{anh}}$  obtained with MP2/ def2TZVP (in kJ/mol), symmetry, inter-ion ( $r_{\text{Li-X}}$ ),  $\text{X}^- \cdots \text{HOH}$  ( $r_{\text{X}\cdots\text{H}}$ ) and  $\text{Li}^+ \cdots \text{OH}_2$  ( $r_{\text{Li}^+\cdots\text{O}}$ ) distances (in pm) and ion-core angle  $\alpha_{\text{X-Li-X}'}$  (in  $^\circ$ ) of low-energy isomers for  $[\text{LiXX}'(\text{H}_2\text{O})_{1-2}]^-$  ( $\text{XX}'=\text{I}_2, \text{ClI}, \text{Cl}_2$ ). The  $r_{\text{Li-X}}/r_{\text{Li-X}'}$  distances of bare  $(\text{LiXX}')^-$  (**0.0.0**) in footnote.<sup>a</sup>

| $n$ | $[\text{LiXX}'(\text{H}_2\text{O})_n]^-$ | Label   | Sym.            | $\Delta E_{0,\text{anh}}^b$ | Bond Distances <sup>c</sup>                          |                              |                               | $\alpha_{\text{X-Li-X}'}$ |
|-----|------------------------------------------|---------|-----------------|-----------------------------|------------------------------------------------------|------------------------------|-------------------------------|---------------------------|
|     |                                          |         |                 |                             | <u><math>r_{\text{Li-X}}/r_{\text{Li-X}'}</math></u> | $r_{\text{X}\cdots\text{H}}$ | $r_{\text{Li}\cdots\text{O}}$ |                           |
| 1   | XX' = I <sub>2</sub>                     | 1.0.0d  | C <sub>s</sub>  | <b>0.0</b>                  | 265/265                                              | 300                          | 200                           | 152                       |
|     |                                          | 1.0.0a  | C <sub>1</sub>  | 10.7                        | 256/254                                              | 278                          | 498                           | 178                       |
|     |                                          | 1.0.0b  | C <sub>2v</sub> | 11.7                        | 254/254                                              | 308                          | 352                           | 162                       |
|     | ClI                                      | 1.0.0c  | C <sub>1</sub>  | <b>0.0</b>                  | 262/227                                              | 215                          | 208                           | 153                       |
|     |                                          | 1.0.0a  | C <sub>1</sub>  | 0.9                         | 256/216                                              | 230                          | 461                           | 178                       |
|     |                                          | 1.0.0c' | C <sub>1</sub>  | 3.2                         | 279/217                                              | 260                          | 204                           | 152                       |
|     | Cl <sub>2</sub>                          | 1.0.0a  | C <sub>1</sub>  | <b>0.0</b>                  | 218/215                                              | 227                          | 458                           | 178                       |
|     |                                          | 1.0.0b  | C <sub>2v</sub> | 1.4                         | 215/215                                              | 259                          | 316                           | 161                       |
|     |                                          | 1.0.0c  | C <sub>1</sub>  | 4.7                         | 231/218                                              | 211                          | 214                           | 153                       |
| 2   | I <sub>2</sub>                           | 2.2.0   | C <sub>s</sub>  | <b>0.0</b>                  | <u>427/260</u>                                       | 247                          | 193                           | 158                       |
|     |                                          | 2.0.0   | C <sub>2v</sub> | 15.0                        | 279/279                                              | 288                          | 200                           | 132                       |
|     |                                          | 2.0.1b  | C <sub>1</sub>  | 17.5                        | 267/267                                              | 258                          | 197                           | 149                       |
|     |                                          | 2.0.1a  | C <sub>1</sub>  | 18.6                        | 271/263                                              | 274                          | 201                           | 136                       |
|     | ClI                                      | 2.2.0   | C <sub>s</sub>  | <b>0.0</b>                  | <u>432/217</u>                                       | 249                          | 195                           | 156                       |
|     |                                          | 2.2.0'  | C <sub>s</sub>  | 2.7                         | <u>380/261</u>                                       | 201                          | 193                           | 158                       |
|     |                                          | 2.0.1a  | C <sub>1</sub>  | 8.5                         | 264/227                                              | 236                          | 205                           | 137                       |
|     |                                          | 2.0.1b  | C <sub>1</sub>  | 13.9                        | 271/224                                              | 212                          | 199                           | 148                       |
|     | Cl <sub>2</sub>                          | 2.2.0   | C <sub>s</sub>  | <b>0.0</b>                  | <u>385/218</u>                                       | 202                          | 196                           | 156                       |
|     |                                          | 2.0.1a  | C <sub>1</sub>  | 5.6                         | 227/221                                              | 230                          | 208                           | 138                       |
|     |                                          | 2.0.1b  | C <sub>1</sub>  | 5.8                         | 226/225                                              | 213                          | 206                           | 147                       |
|     |                                          | 2.0.0   | C <sub>2v</sub> | 13.4                        | 233/233                                              | 240                          | 210                           | 129                       |

<sup>a</sup>  $r_{\text{Li-I}}/r_{\text{Li-I}} = 255/255$  in  $\text{LiI}_2^-$ ;  $r_{\text{Li-I}}/r_{\text{Li-Cl}} = 258/214$  in  $\text{LiClI}^-$ ;  $r_{\text{Li-Cl}}/r_{\text{Li-Cl}} = 216/216$  in  $\text{LiCl}_2^-$ .

<sup>b</sup> ZPE-corrected energies derived from anharmonic MP2/VPT2 frequencies.

<sup>c</sup> Inter-ion distances of solvent-shared motifs underlined.

**Table S2b.** ZPE-corrected relative energies  $\Delta E_{0,\text{anh}}$  obtained with MP2/ def2TZVP (in kJ/mol), symmetry, inter-ion ( $r_{\text{Li-X}}$ ),  $X^- \cdots \text{HOH}$  ( $r_{X \cdots \text{H}}$ ) and  $\text{Li}^+ \cdots \text{OH}_2$  ( $r_{\text{Li}^+ \cdots \text{O}}$ ) distances (in pm) and ion-core angle  $\alpha_{X-\text{Li}-X'}$  (in  $^\circ$ ) of low-energy isomers for  $[\text{LiXX}'(\text{H}_2\text{O})_3]^-$  ( $\text{XX}'=\text{I}_2, \text{ClI}, \text{Cl}_2$ ). The  $r_{\text{Li-X}}/r_{\text{Li-X}'}$  distances of bare  $(\text{LiXX}')^-$  (**0.0.0**) in footnote.<sup>a</sup>

| $n$ | $[\text{LiXX}'(\text{H}_2\text{O})_n]^-$ | Label  | Sym.  | $\Delta E_{0,\text{anh}}^b$ | Bond Distances <sup>c</sup>        |                         |                                   | $\alpha_{X-\text{Li}-X'}$ |
|-----|------------------------------------------|--------|-------|-----------------------------|------------------------------------|-------------------------|-----------------------------------|---------------------------|
|     |                                          |        |       |                             | $r_{\text{Li-X}}/r_{\text{Li-X}'}$ | $r_{X \cdots \text{H}}$ | $r_{\text{Li}^+ \cdots \text{O}}$ |                           |
| 3   | $\text{I}_2$                             | 3.3.0a | $C_1$ | <b>0.0</b>                  | <u>390</u> / 276                   | 266                     | 198                               | 134                       |
|     |                                          | 3.3.0b | $C_3$ | 3.2                         | <u>407</u> / 265                   | 259                     | 202                               | 180                       |
|     |                                          | 3.2.1a | $C_1$ | 3.4                         | <u>401</u> / 263                   | 249                     | 194                               | 120                       |
|     |                                          | 3.2.1b | $C_1$ | 3.6                         | <u>416</u> / 265                   | 244                     | 190                               | 146                       |
|     |                                          | 3.2.1c | $C_1$ | 5.0                         | <u>420</u> / 265                   | 243                     | 190                               | 156                       |
|     |                                          | 3.0.2  | $C_1$ | <u>9.8</u>                  | <u>269</u> / 266                   | 275                     | 196                               | 135                       |
|     |                                          | 3.2.1b | $C_1$ | <b>0.0</b>                  | <u>420</u> / 222                   | 216                     | 192                               | 143                       |
|     |                                          | 3.2.1c | $C_1$ | 1.1                         | <u>424</u> / 222                   | 216                     | 191                               | 153                       |
|     |                                          | 3.2.1a | $C_1$ | 1.7                         | <u>399</u> / 221                   | 230                     | 194                               | 116                       |
|     | $\text{ClI}$                             | 3.0.2  | $C_1$ | 5.8                         | 271 / 223                          | 237                     | 197                               | 135                       |
|     |                                          | 3.3.0a | $C_1$ | 6.5                         | <u>389</u> / 231                   | 263                     | 200                               | 127                       |
|     |                                          | 3.3.0b | $C_3$ | 13.2                        | <u>415</u> / 221                   | 260                     | 206                               | 180                       |
|     | $\text{Cl}_2$                            | 3.0.2  | $C_1$ | <b>0.0</b>                  | 228 / 225                          | 233                     | 202                               | 135                       |
|     |                                          | 3.2.1a | $C_1$ | 4.6                         | <u>354</u> / 221                   | 204                     | 195                               | 118                       |
|     |                                          | 3.2.1b | $C_1$ | 5.0                         | <u>372</u> / 223                   | 198                     | 193                               | 143                       |
|     |                                          | 3.2.1c | $C_1$ | 6.2                         | <u>376</u> / 223                   | 198                     | 192                               | 152                       |
|     |                                          | 3.3.0a | $C_1$ | 10.5                        | <u>340</u> / 230                   | 216                     | 200                               | 127                       |
|     |                                          | 3.3.0b | $C_3$ | 12.5                        | <u>366</u> / 220                   | 215                     | 208                               | 180                       |

<sup>a</sup>  $r_{\text{Li-I}}/r_{\text{Li-I}} = 255/255$  in  $\text{LiI}_2^-$ ;  $r_{\text{Li-I}}/r_{\text{Li-Cl}} = 258/214$  in  $\text{LiClI}^-$ ;  $r_{\text{Li-Cl}}/r_{\text{Li-Cl}} = 216/216$  in  $\text{LiCl}_2^-$ .

<sup>b</sup> ZPE-corrected energies derived from anharmonic MP2/VPT2 frequencies.

<sup>c</sup> Inter-ion distances of solvent-shared motifs are underlined.

**Table S3:** Value for the cosine similarity ( $S$ ) between the IRPD spectra and calculated VPT2/MP2 anharmonic spectra for  $[\text{LiI}_2(\text{H}_2\text{O})_n]^-$  ( $n = 1-3$ ) isomers.

| $[\text{LiI}_2(\text{H}_2\text{O})_n]^-$ | Structures    | $S$  |
|------------------------------------------|---------------|------|
| $n = 1$                                  | <b>1.0.0a</b> | 0.29 |
|                                          | <b>1.0.0b</b> | 0.37 |
|                                          | <b>1.0.0d</b> | 0.69 |
| 2                                        | <b>2.2.0</b>  | 0.65 |
|                                          | <b>2.0.0</b>  | 0.04 |
|                                          | <b>2.0.1a</b> | 0.06 |
|                                          | <b>2.0.1b</b> | 0.09 |
| 3                                        | <b>3.0.2</b>  | 0.40 |
|                                          | <b>3.2.1a</b> | 0.18 |
|                                          | <b>3.2.1b</b> | 0.24 |
|                                          | <b>3.2.1c</b> | 0.37 |
|                                          | <b>3.3.0a</b> | 0.54 |
|                                          | <b>3.3.0b</b> | 0.81 |

<sup>a</sup>Cosine similarity<sup>[7]</sup> ( $S$ ) has been employed to evaluate the agreement between anharmonic calculated and measured IR<sup>2</sup>MS<sup>2</sup> spectra. This is an assessment for the similarity of two

vectors, as follows:  $S = \frac{\sum a_i \cdot c_i}{\sqrt{\sum a_i^2} \cdot \sqrt{\sum c_i^2}}$

The intensities of the IRPD spectrum are interpreted as vector  $a_i$  and the intensities of the calculated spectrum are interpreted as vector  $c_i$ . S-value towards 1 conveys better agreement while value towards 0 indicate poor agreement. The values for S given refer only to the region (2800 to 3750  $\text{cm}^{-1}$ ).

**Table S4:** Value for the cosine similarity ( $S$ ) between the IRPD spectra and calculated VPT2/MP2 anharmonic spectra for  $[\text{LiClI}(\text{H}_2\text{O})_n]^-$  ( $n = 1-3$ ) isomers.

| $[\text{LiClI}(\text{H}_2\text{O})_n]^-$ | Structures     | $S$  |
|------------------------------------------|----------------|------|
| $n = 1$                                  | <b>1.0.0a</b>  | 0.20 |
|                                          | <b>1.0.0c</b>  | 0.67 |
|                                          | <b>1.0.0c'</b> | 0.42 |
| 2                                        | <b>2.2.0</b>   | 0.49 |
|                                          | <b>2.2.0'</b>  | 0.11 |
|                                          | <b>2.0.1a</b>  | 0.11 |
|                                          | <b>2.0.1b</b>  | 0.24 |
| 3                                        | <b>3.0.2</b>   | 0.46 |
|                                          | <b>3.2.1a</b>  | 0.38 |
|                                          | <b>3.2.1b</b>  | 0.38 |
|                                          | <b>3.2.1c</b>  | 0.36 |
|                                          | <b>3.3.0a</b>  | 0.57 |
|                                          | <b>3.3.0b</b>  | 0.26 |

**Table S5:** Cartesian coordinates (in Ångstrom) for the MP2 / def2TZVP optimized structure of  $[\text{LiCl}_2(\text{H}_2\text{O})_n]^-$  where  $n = 1-3$ .

$n = 1$

**1.0.0a**

|    | X               | Y               | Z               |
|----|-----------------|-----------------|-----------------|
| Li | 0.866375000000  | -0.380629000000 | 0.000216000000  |
| Cl | -1.186398000000 | -1.112384000000 | -0.000045000000 |
| O  | -3.240640000000 | 1.330957000000  | 0.000115000000  |
| H  | -2.695807000000 | 0.523152000000  | 0.000246000000  |
| H  | -2.576799000000 | 2.021676000000  | -0.000952000000 |
| Cl | 2.868668000000  | 0.403526000000  | -0.000006000000 |

**1.0.0b**

|    |                 |                 |                 |
|----|-----------------|-----------------|-----------------|
| Li | 0.000918000000  | -0.871667000000 | 0.002658000000  |
| Cl | 2.128062000000  | -0.524296000000 | -0.000228000000 |
| Cl | -2.126649000000 | -0.526191000000 | -0.000223000000 |
| O  | -0.002936000000 | 2.166606000000  | 0.000710000000  |
| H  | -0.762754000000 | 1.568526000000  | -0.003102000000 |
| H  | 0.759451000000  | 1.571895000000  | -0.002871000000 |

**1.0.0c**

|    |                 |                 |                 |
|----|-----------------|-----------------|-----------------|
| Li | 0.196331000000  | -0.090057000000 | -0.222285000000 |
| Cl | 2.351988000000  | -0.328698000000 | 0.016290000000  |
| Cl | -1.987937000000 | -0.747514000000 | 0.019729000000  |
| O  | -0.629827000000 | 1.890227000000  | -0.097043000000 |
| H  | -1.389228000000 | 1.286553000000  | 0.049860000000  |
| H  | -0.350001000000 | 2.157402000000  | 0.781032000000  |

**1.1.0**

|    |                 |                 |                 |
|----|-----------------|-----------------|-----------------|
| Li | 1.117938000000  | 0.111460000000  | -0.020401000000 |
| Cl | -3.051992000000 | -0.363985000000 | 0.003741000000  |



|    |                 |                 |                 |
|----|-----------------|-----------------|-----------------|
| O  | -0.511577000000 | 0.954797000000  | -0.021045000000 |
| H  | -0.739833000000 | 1.873393000000  | 0.116715000000  |
| H  | -1.416900000000 | 0.469181000000  | -0.022432000000 |
| Cl | 3.222318000000  | -0.242799000000 | 0.004216000000  |

$n = 2$

### 2.2.0

|    |                 |                 |                 |
|----|-----------------|-----------------|-----------------|
| Li | 0.958663000000  | 0.000005000000  | 0.354263000000  |
| O  | -0.299484000000 | 1.493174000000  | 0.454428000000  |
| H  | -0.138033000000 | 2.191554000000  | -0.181772000000 |
| H  | -1.193549000000 | 1.130275000000  | 0.219776000000  |
| O  | -0.299479000000 | -1.493172000000 | 0.454430000000  |
| H  | -1.193532000000 | -1.130292000000 | 0.219699000000  |
| H  | -0.137978000000 | -2.191570000000 | -0.181738000000 |
| Cl | 3.058765000000  | 0.000002000000  | -0.219525000000 |
| Cl | -2.789423000000 | -0.000002000000 | -0.275158000000 |

### 2.0.1a

|    |                 |                 |                 |
|----|-----------------|-----------------|-----------------|
| Cl | -2.203407000000 | -0.614562000000 | -0.153972000000 |
| Cl | 1.967741000000  | -0.874499000000 | 0.170011000000  |
| H  | 0.263413000000  | 1.794544000000  | -0.495874000000 |
| H  | 1.464932000000  | 1.049405000000  | -1.014413000000 |
| H  | -1.021279000000 | 0.799408000000  | 1.175808000000  |
| H  | 0.464400000000  | 0.691887000000  | 1.489135000000  |
| Li | -0.076729000000 | -0.435278000000 | -0.725355000000 |
| O  | 0.631417000000  | 1.442394000000  | -1.322850000000 |
| O  | -0.248286000000 | 1.343184000000  | 1.416443000000  |

### 2.0.1b

|    |                 |                 |                 |
|----|-----------------|-----------------|-----------------|
| Li | 0.308426000000  | -0.575778000000 | 0.471016000000  |
| Cl | -1.806796000000 | -1.221619000000 | 0.134470000000  |
| Cl | 2.400813000000  | -0.444484000000 | -0.348027000000 |
| O  | 0.454920000000  | 1.368233000000  | 1.172917000000  |
| H  | 1.294298000000  | 1.292311000000  | 0.689175000000  |
| H  | -0.178728000000 | 1.734063000000  | 0.533591000000  |
| O  | -1.593148000000 | 1.713828000000  | -0.781133000000 |
| H  | -1.837558000000 | 0.804228000000  | -0.497638000000 |
| H  | -1.195767000000 | 1.563986000000  | -1.641975000000 |

### 2.0.0

|    |                 |                 |                 |
|----|-----------------|-----------------|-----------------|
| Li | -0.000026000000 | -0.000120000000 | 0.605917000000  |
| Cl | -2.085365000000 | 0.000073000000  | -0.390973000000 |
| Cl | 2.085203000000  | -0.000064000000 | -0.391048000000 |
| O  | 0.000298000000  | 2.095316000000  | 0.687676000000  |
| H  | 0.769622000000  | 1.933423000000  | 0.118526000000  |
| H  | -0.769249000000 | 1.934569000000  | 0.118584000000  |
| O  | 0.000020000000  | -2.095470000000 | 0.687587000000  |
| H  | 0.769435000000  | -1.933160000000 | 0.118630000000  |
| H  | -0.769516000000 | -1.933398000000 | 0.118756000000  |

### 2.0.1c

|    |                 |                 |                 |
|----|-----------------|-----------------|-----------------|
| Li | -1.525821000000 | -0.318034000000 | 0.203816000000  |
| Cl | -3.521695000000 | 0.205790000000  | -0.364651000000 |
| Cl | 0.541503000000  | -0.746783000000 | 0.798720000000  |
| O  | 2.429873000000  | 1.720689000000  | 0.298908000000  |
| H  | 1.824341000000  | 1.009976000000  | 0.584732000000  |
| H  | 1.871639000000  | 2.262508000000  | -0.261582000000 |
| O  | 3.290350000000  | -0.744271000000 | -1.146056000000 |
| H  | 3.293749000000  | 0.157742000000  | -0.803293000000 |

|   |                |                 |                 |
|---|----------------|-----------------|-----------------|
| H | 2.489218000000 | -1.090589000000 | -0.733288000000 |
|---|----------------|-----------------|-----------------|

*n* = 3

### 3.0.2

|    |                 |                 |                 |
|----|-----------------|-----------------|-----------------|
| Cl | -1.725824000000 | -1.114666000000 | -0.764348000000 |
| Cl | 2.334841000000  | -0.452350000000 | -0.083749000000 |
| H  | -0.230406000000 | 1.954359000000  | -0.418438000000 |
| H  | 1.263589000000  | 1.666175000000  | -0.665634000000 |
| H  | -1.928244000000 | 0.948957000000  | 0.307600000000  |
| H  | -1.003180000000 | 1.093142000000  | 1.469009000000  |
| H  | -0.647380000000 | -1.009327000000 | 1.385223000000  |
| H  | 0.778784000000  | -0.551594000000 | 1.588689000000  |
| Li | 0.305152000000  | -0.227770000000 | -1.066704000000 |
| O  | 0.422648000000  | 1.790317000000  | -1.128568000000 |
| O  | -1.517369000000 | 1.642681000000  | 0.851272000000  |
| O  | -0.093018000000 | -0.530389000000 | 2.021208000000  |

### 3.2.1a

|    |                 |                 |                 |
|----|-----------------|-----------------|-----------------|
| Li | 0.751344000000  | 0.661063000000  | 0.897245000000  |
| O  | -0.244720000000 | 2.131173000000  | 0.073340000000  |
| H  | 0.273216000000  | 2.194031000000  | -0.735096000000 |
| H  | -1.040519000000 | 1.603449000000  | -0.191024000000 |
| O  | -0.406516000000 | -0.637201000000 | 1.789443000000  |
| H  | -1.233092000000 | -0.414213000000 | 1.309415000000  |
| H  | -0.115422000000 | -1.408396000000 | 1.270471000000  |
| Cl | 2.534439000000  | 0.158261000000  | -0.292902000000 |
| Cl | -2.340020000000 | 0.059499000000  | -0.485296000000 |
| O  | 0.174489000000  | -2.073418000000 | -0.561314000000 |
| H  | -0.579549000000 | -1.517825000000 | -0.819684000000 |
| H  | 0.950190000000  | -1.506595000000 | -0.708188000000 |

### 3.2.1b

|    |                 |                 |                 |
|----|-----------------|-----------------|-----------------|
| Li | -0.486916000000 | -0.791592000000 | 0.595774000000  |
| O  | 0.992101000000  | -1.936133000000 | 0.092023000000  |
| H  | 0.879198000000  | -2.371951000000 | -0.754503000000 |
| H  | 1.722654000000  | -1.273041000000 | -0.065809000000 |
| O  | 0.292751000000  | 0.869764000000  | 1.196698000000  |
| H  | 1.176066000000  | 0.884617000000  | 0.762619000000  |
| H  | -0.242084000000 | 1.539412000000  | 0.741890000000  |
| Cl | -2.579096000000 | -0.823849000000 | -0.149002000000 |
| Cl | 2.873588000000  | 0.314672000000  | -0.339232000000 |
| O  | -1.729609000000 | 2.165285000000  | -0.364494000000 |
| H  | -2.147712000000 | 1.279837000000  | -0.309126000000 |
| H  | -1.375669000000 | 2.180590000000  | -1.256243000000 |

### 3.2.1c

|    |                 |                 |                 |
|----|-----------------|-----------------|-----------------|
| Li | 0.751344000000  | 0.661063000000  | 0.897245000000  |
| O  | -0.244720000000 | 2.131173000000  | 0.073340000000  |
| H  | 0.273216000000  | 2.194031000000  | -0.735096000000 |
| H  | -1.040519000000 | 1.603449000000  | -0.191024000000 |
| O  | -0.406516000000 | -0.637201000000 | 1.789443000000  |
| H  | -1.233092000000 | -0.414213000000 | 1.309415000000  |
| H  | -0.115422000000 | -1.408396000000 | 1.270471000000  |
| Cl | 2.534439000000  | 0.158261000000  | -0.292902000000 |
| Cl | -2.340020000000 | 0.059499000000  | -0.485296000000 |
| O  | 0.174489000000  | -2.073418000000 | -0.561314000000 |
| H  | -0.579549000000 | -1.517825000000 | -0.819684000000 |
| H  | 0.950190000000  | -1.506595000000 | -0.708188000000 |

### 3.3.0

|    |                |                |                |
|----|----------------|----------------|----------------|
| Li | 0.908418000000 | 0.001214000000 | 0.000696000000 |
|----|----------------|----------------|----------------|

|    |                 |                 |                 |
|----|-----------------|-----------------|-----------------|
| O  | -0.216157000000 | -1.173404000000 | -1.276274000000 |
| H  | -0.092034000000 | -0.856915000000 | -2.173152000000 |
| H  | -1.125459000000 | -0.894473000000 | -1.033812000000 |
| O  | -0.217528000000 | -0.520140000000 | 1.655230000000  |
| H  | -0.093892000000 | -1.456085000000 | 1.824696000000  |
| H  | -1.126292000000 | -0.447849000000 | 1.291450000000  |
| O  | -0.217603000000 | 1.693664000000  | -0.376515000000 |
| H  | -1.126490000000 | 1.342437000000  | -0.258091000000 |
| H  | -0.095674000000 | 2.310676000000  | 0.347637000000  |
| Cl | 3.113261000000  | 0.000109000000  | -0.000351000000 |
| Cl | -2.751797000000 | -0.000249000000 | -0.000846000000 |

**Table S4:** Cartesian coordinates (in Ångstrom) for the MP2/def2TZVP optimized structure of  $[\text{LiClI}(\text{H}_2\text{O})_n]^-$  where  $n = 1-3$ .

**$n = 1$**

**1.0.0a**

|    | X               | Y               | Z               |
|----|-----------------|-----------------|-----------------|
| Li | 0.660152000000  | -0.507717000000 | -0.032246000000 |
| Cl | 2.743244000000  | -1.073508000000 | 0.016236000000  |
| O  | 4.879018000000  | 1.358646000000  | -0.080833000000 |
| H  | 4.318056000000  | 0.576996000000  | -0.239009000000 |
| H  | 4.528472000000  | 1.686242000000  | 0.752858000000  |
| I  | -1.820647000000 | 0.125290000000  | -0.000876000000 |

**1.0.0c**

|    |                 |                 |                 |
|----|-----------------|-----------------|-----------------|
| Li | -1.121794000000 | 0.011276000000  | -0.255756000000 |
| Cl | -3.217294000000 | -0.821414000000 | 0.023716000000  |
| O  | -2.015825000000 | 1.881900000000  | -0.095741000000 |
| H  | -2.776561000000 | 1.282632000000  | 0.077728000000  |
| H  | -1.776172000000 | 2.269181000000  | 0.752676000000  |

|   |                |                 |                |
|---|----------------|-----------------|----------------|
| I | 1.485636000000 | -0.088242000000 | 0.005653000000 |
|---|----------------|-----------------|----------------|

**1.0.0c'**

|    |                |                |                 |
|----|----------------|----------------|-----------------|
| Li | 1.389778000000 | 0.060160000000 | -0.285109000000 |
|----|----------------|----------------|-----------------|

|   |                |                |                 |
|---|----------------|----------------|-----------------|
| O | 1.082767000000 | 2.070607000000 | -0.094189000000 |
|---|----------------|----------------|-----------------|

|   |                |                |                |
|---|----------------|----------------|----------------|
| H | 0.144557000000 | 1.908549000000 | 0.123671000000 |
|---|----------------|----------------|----------------|

|   |                |                |                |
|---|----------------|----------------|----------------|
| H | 1.514418000000 | 2.329662000000 | 0.727688000000 |
|---|----------------|----------------|----------------|

|    |                |                 |                |
|----|----------------|-----------------|----------------|
| Cl | 3.425843000000 | -0.622618000000 | 0.023589000000 |
|----|----------------|-----------------|----------------|

|   |                 |                 |                |
|---|-----------------|-----------------|----------------|
| I | -1.372260000000 | -0.196208000000 | 0.006726000000 |
|---|-----------------|-----------------|----------------|

*n* = 2

**2.2.0**

|    |                |                |                |
|----|----------------|----------------|----------------|
| Li | 2.357714000000 | 0.000000000000 | 0.365194000000 |
|----|----------------|----------------|----------------|

|   |                |                |                |
|---|----------------|----------------|----------------|
| O | 1.108574000000 | 1.494051000000 | 0.526658000000 |
|---|----------------|----------------|----------------|

|   |                |                |                 |
|---|----------------|----------------|-----------------|
| H | 1.243864000000 | 2.251585000000 | -0.051313000000 |
|---|----------------|----------------|-----------------|

|   |                |                |                |
|---|----------------|----------------|----------------|
| H | 0.171422000000 | 1.225173000000 | 0.389431000000 |
|---|----------------|----------------|----------------|

|   |                |                 |                |
|---|----------------|-----------------|----------------|
| O | 1.108574000000 | -1.494051000000 | 0.526658000000 |
|---|----------------|-----------------|----------------|

|   |                |                 |                |
|---|----------------|-----------------|----------------|
| H | 0.171422000000 | -1.225173000000 | 0.389431000000 |
|---|----------------|-----------------|----------------|

|   |                |                 |                 |
|---|----------------|-----------------|-----------------|
| H | 1.243864000000 | -2.251585000000 | -0.051313000000 |
|---|----------------|-----------------|-----------------|

|   |                 |                |                 |
|---|-----------------|----------------|-----------------|
| I | -1.941588000000 | 0.000000000000 | -0.098416000000 |
|---|-----------------|----------------|-----------------|

|    |                |                |                 |
|----|----------------|----------------|-----------------|
| Cl | 4.427253000000 | 0.000000000000 | -0.293075000000 |
|----|----------------|----------------|-----------------|

**2.2.0'**

|    |                |                |                |
|----|----------------|----------------|----------------|
| Li | 0.496664000000 | 0.000000000000 | 0.424783000000 |
|----|----------------|----------------|----------------|

|   |                |                 |                |
|---|----------------|-----------------|----------------|
| O | 1.737389000000 | -1.472267000000 | 0.449940000000 |
|---|----------------|-----------------|----------------|

|   |                |                 |                 |
|---|----------------|-----------------|-----------------|
| H | 1.595259000000 | -2.253253000000 | -0.092217000000 |
|---|----------------|-----------------|-----------------|

|   |                |                 |                |
|---|----------------|-----------------|----------------|
| H | 2.643784000000 | -1.128631000000 | 0.207939000000 |
|---|----------------|-----------------|----------------|

|   |                |                |                |
|---|----------------|----------------|----------------|
| O | 1.737389000000 | 1.472267000000 | 0.449940000000 |
|---|----------------|----------------|----------------|

|   |                |                |                |
|---|----------------|----------------|----------------|
| H | 2.643783000000 | 1.128632000000 | 0.207936000000 |
|---|----------------|----------------|----------------|

|   |                |                |                 |
|---|----------------|----------------|-----------------|
| H | 1.595258000000 | 2.253254000000 | -0.092216000000 |
|---|----------------|----------------|-----------------|

|   |                 |                |                 |
|---|-----------------|----------------|-----------------|
| I | -2.069660000000 | 0.000000000000 | -0.068528000000 |
|---|-----------------|----------------|-----------------|

|    |                |                |                 |
|----|----------------|----------------|-----------------|
| Cl | 4.230921000000 | 0.000000000000 | -0.298402000000 |
|----|----------------|----------------|-----------------|

**2.0.1a**

|    |                 |                 |                 |
|----|-----------------|-----------------|-----------------|
| Li | -0.835469000000 | -0.440683000000 | 0.576686000000  |
| Cl | -2.783851000000 | -1.432041000000 | 0.103807000000  |
| O  | -3.288918000000 | 1.494825000000  | -0.719340000000 |
| H  | -3.321476000000 | 0.547653000000  | -0.437320000000 |
| H  | -3.044167000000 | 1.431193000000  | -1.648973000000 |
| I  | 1.765436000000  | -0.068684000000 | -0.094450000000 |
| O  | -1.119269000000 | 1.478456000000  | 1.033442000000  |
| H  | -0.277248000000 | 1.785828000000  | 0.665866000000  |
| H  | -1.827832000000 | 1.756081000000  | 0.418680000000  |

### 2.0.1b

|    |                 |                 |                 |
|----|-----------------|-----------------|-----------------|
| Li | -0.929359000000 | -0.389018000000 | 0.738623000000  |
| O  | -1.909375000000 | 1.264635000000  | 1.467816000000  |
| H  | -1.690674000000 | 1.789102000000  | 0.675304000000  |
| H  | -2.708474000000 | 0.787593000000  | 1.179642000000  |
| Cl | -2.860286000000 | -1.126698000000 | -0.195737000000 |
| O  | -1.387177000000 | 1.599590000000  | -1.325271000000 |
| H  | -1.913887000000 | 0.781307000000  | -1.375999000000 |
| H  | -0.467288000000 | 1.286149000000  | -1.342167000000 |
| I  | 1.595579000000  | -0.136548000000 | 0.015746000000  |

$n = 3$

### 3.0.2

|    |                 |                 |                 |
|----|-----------------|-----------------|-----------------|
| Cl | -2.534944000000 | -1.338122000000 | -0.772419000000 |
| H  | -1.618194000000 | 1.926473000000  | -0.493032000000 |
| H  | -0.082207000000 | 2.036878000000  | -0.740511000000 |
| H  | -3.178478000000 | 0.730297000000  | 0.208883000000  |
| H  | -2.340863000000 | 1.062239000000  | 1.410672000000  |
| H  | -1.649365000000 | -0.994315000000 | 1.403632000000  |
| H  | -0.339668000000 | -0.348198000000 | 1.836090000000  |
| Li | -0.678684000000 | -0.148679000000 | -1.135344000000 |

|   |                 |                 |                 |
|---|-----------------|-----------------|-----------------|
| O | -0.916961000000 | 1.811367000000  | -1.176205000000 |
| O | -2.874584000000 | 1.503296000000  | 0.720281000000  |
| O | -1.275896000000 | -0.410735000000 | 2.089787000000  |
| I | 1.790159000000  | -0.083975000000 | -0.003009000000 |

### 3.2.1a

|    |                 |                 |                 |
|----|-----------------|-----------------|-----------------|
| Li | 1.962922000000  | 0.662419000000  | 0.967204000000  |
| O  | 0.868605000000  | 2.135798000000  | 0.293906000000  |
| H  | 1.265654000000  | 2.199133000000  | -0.585348000000 |
| H  | -0.020579000000 | 1.745891000000  | 0.134251000000  |
| O  | 0.954883000000  | -0.713200000000 | 1.897978000000  |
| H  | 0.013960000000  | -0.528397000000 | 1.714170000000  |
| H  | 1.136036000000  | -1.447199000000 | 1.269119000000  |
| Cl | 3.526323000000  | 0.236746000000  | -0.538093000000 |
| O  | 1.334230000000  | -2.134414000000 | -0.443844000000 |
| H  | 2.057901000000  | -1.535304000000 | -0.714880000000 |
| H  | 0.525319000000  | -1.711970000000 | -0.776258000000 |
| I  | -1.812760000000 | 0.018121000000  | -0.165649000000 |

### 3.2.1b

|    |                 |                 |                 |
|----|-----------------|-----------------|-----------------|
| Li | -1.860794000000 | -0.834708000000 | 0.599458000000  |
| O  | -0.433042000000 | -2.094566000000 | 0.236667000000  |
| H  | -0.475094000000 | -2.583593000000 | -0.591732000000 |
| H  | 0.412603000000  | -1.585281000000 | 0.179443000000  |
| O  | -1.036587000000 | 0.784669000000  | 1.232243000000  |
| H  | -0.099286000000 | 0.847186000000  | 0.962757000000  |
| H  | -1.510212000000 | 1.515457000000  | 0.789763000000  |
| Cl | -3.899705000000 | -0.717392000000 | -0.278462000000 |
| O  | -2.900044000000 | 2.242095000000  | -0.285297000000 |
| H  | -3.391355000000 | 1.388614000000  | -0.286321000000 |
| H  | -2.583973000000 | 2.316139000000  | -1.192313000000 |



I 2.160039000000 0.100824000000 -0.120661000000

### 3.2.1c

Li -1.842031000000 -0.823468000000 0.436568000000  
O -0.353414000000 -2.048238000000 0.271867000000  
H -0.291655000000 -2.658527000000 -0.469737000000  
H 0.483182000000 -1.521125000000 0.228311000000  
O -1.068388000000 0.885577000000 0.822188000000  
H -0.132572000000 0.986894000000 0.562370000000  
H -1.593758000000 1.583786000000 0.390151000000  
Cl -3.971960000000 -0.847445000000 -0.205857000000  
O -3.282781000000 2.196760000000 -0.299797000000  
H -3.591752000000 1.269225000000 -0.421494000000  
H -3.833717000000 2.515141000000 0.422815000000  
I 2.257478000000 0.121298000000 -0.092012000000

### 3.3.0a

Li 0.542550000000 0.472073000000 0.640249000000  
O 1.161803000000 -1.378010000000 0.991628000000  
O 2.172407000000 1.448860000000 1.409243000000  
I -2.073931000000 -0.044597000000 -0.047208000000  
H 0.519156000000 -1.919983000000 0.517806000000  
H 2.008851000000 -1.416728000000 0.492356000000  
H 2.824841000000 0.838647000000 0.990272000000  
H 2.243780000000 2.236639000000 0.857034000000  
O 1.121788000000 1.027738000000 -1.229689000000  
H 1.942776000000 0.496028000000 -1.330340000000  
H 0.427890000000 0.613836000000 -1.759148000000  
Cl 3.686791000000 -0.511159000000 -0.503303000000

### 3.3.0b

Li 2.115283000000 0.000008000000 0.000003000000

|    |                 |                 |                 |
|----|-----------------|-----------------|-----------------|
| O  | 1.023455000000  | -1.201428000000 | -1.272306000000 |
| H  | 1.189295000000  | -0.958768000000 | -2.189459000000 |
| H  | 0.079005000000  | -1.000288000000 | -1.118798000000 |
| O  | 1.023451000000  | -0.501171000000 | 1.676628000000  |
| H  | 1.189298000000  | -1.416797000000 | 1.924982000000  |
| H  | 0.079002000000  | -0.468789000000 | 1.425680000000  |
| O  | 1.023454000000  | 1.702582000000  | -0.404281000000 |
| H  | 0.079004000000  | 1.469068000000  | -0.306847000000 |
| H  | 1.189298000000  | 2.375506000000  | 0.264468000000  |
| Cl | 4.323443000000  | 0.000005000000  | -0.000010000000 |
| I  | -2.041739000000 | 0.000002000000  | -0.000004000000 |

**Table S4:** Cartesian coordinates (in Ångstrom) for the MP2/def2TZVP optimized structure of  $[\text{Li}_2(\text{H}_2\text{O})_n]^-$  where  $n = 1-3$ .

**$n = 1$**

**1.0.0a**

|    | X               | Y               | Z               |
|----|-----------------|-----------------|-----------------|
| Li | -0.318675000000 | -0.301781000000 | -0.002335000000 |
| O  | 3.370878000000  | 2.891871000000  | -0.002591000000 |
| H  | 3.310332000000  | 1.923136000000  | -0.008836000000 |
| H  | 2.444985000000  | 3.153175000000  | 0.026261000000  |
| I  | 2.221781000000  | -0.633742000000 | 0.000231000000  |
| I  | -2.821146000000 | 0.118535000000  | -0.000037000000 |

**1.0.0b**

|    |                 |                 |                 |
|----|-----------------|-----------------|-----------------|
| Li | -0.000348000000 | -0.631848000000 | -0.002508000000 |
| O  | 0.002962000000  | 2.886645000000  | -0.000523000000 |
| H  | -0.760314000000 | 2.292732000000  | 0.002176000000  |
| H  | 0.765141000000  | 2.291284000000  | 0.001838000000  |
| I  | -2.506811000000 | -0.242900000000 | 0.000072000000  |

|   |                |                 |                |
|---|----------------|-----------------|----------------|
| I | 2.506292000000 | -0.243545000000 | 0.000074000000 |
|---|----------------|-----------------|----------------|

### 1.0.0d

|    |                 |                 |                 |
|----|-----------------|-----------------|-----------------|
| Li | 0.002050000000  | 0.195848000000  | 0.479359000000  |
| O  | -0.007384000000 | 2.160306000000  | 0.089502000000  |
| H  | 0.771016000000  | 2.168298000000  | -0.486511000000 |
| H  | -0.794926000000 | 2.157192000000  | -0.474415000000 |
| I  | -2.571497000000 | -0.210072000000 | -0.011261000000 |
| I  | 2.572947000000  | -0.208711000000 | -0.011252000000 |

$n = 2$

### 2.2.0

|    |                 |                 |                 |
|----|-----------------|-----------------|-----------------|
| Li | -0.901359000000 | 0.000814000000  | 0.495059000000  |
| O  | 0.315437000000  | 1.493040000000  | 0.575945000000  |
| H  | 1.251582000000  | 1.234450000000  | 0.404871000000  |
| H  | 0.163059000000  | 2.285711000000  | 0.052103000000  |
| I  | -3.426182000000 | -0.000091000000 | -0.100763000000 |
| I  | 3.328629000000  | -0.000119000000 | -0.118440000000 |
| O  | 0.315307000000  | -1.492004000000 | 0.576184000000  |
| H  | 0.162468000000  | -2.286033000000 | 0.054616000000  |
| H  | 1.251306000000  | -1.233764000000 | 0.403964000000  |

### 2.0.0

|    |                 |                 |                 |
|----|-----------------|-----------------|-----------------|
| Li | 0.001641000000  | 0.000010000000  | 0.918247000000  |
| O  | -0.000358000000 | 1.985542000000  | 1.179346000000  |
| H  | 0.776975000000  | 2.113900000000  | 0.611397000000  |
| H  | -0.778949000000 | 2.111420000000  | 0.612473000000  |
| I  | -2.550114000000 | 0.000270000000  | -0.227072000000 |
| I  | 2.550457000000  | 0.000076000000  | -0.226888000000 |
| O  | -0.001651000000 | -1.987542000000 | 1.178170000000  |

|   |                 |                 |                |
|---|-----------------|-----------------|----------------|
| H | -0.780440000000 | -2.112037000000 | 0.611309000000 |
| H | 0.775379000000  | -2.115660000000 | 0.609836000000 |

### **2.0.1a**

|    |                 |                 |                 |
|----|-----------------|-----------------|-----------------|
| Li | 0.053186000000  | 0.074438000000  | 0.874554000000  |
| O  | -0.404161000000 | 1.960617000000  | 1.397282000000  |
| H  | -0.128952000000 | 2.327485000000  | 0.532196000000  |
| H  | -1.360167000000 | 1.834544000000  | 1.284283000000  |
| I  | -2.445851000000 | -0.398779000000 | -0.050692000000 |
| O  | 0.166889000000  | 2.064402000000  | -1.353386000000 |
| H  | -0.558059000000 | 1.441779000000  | -1.524490000000 |
| H  | 0.959071000000  | 1.497586000000  | -1.317152000000 |
| I  | 2.499185000000  | -0.346973000000 | 0.013906000000  |

### **2.0.1b**

|    |                 |                 |                 |
|----|-----------------|-----------------|-----------------|
| Li | 0.123784000000  | 0.007472000000  | 0.530854000000  |
| I  | -2.424032000000 | -0.623545000000 | 0.017713000000  |
| O  | -1.826765000000 | 2.772331000000  | -0.629550000000 |
| H  | -2.237000000000 | 1.917716000000  | -0.377948000000 |
| H  | -1.618883000000 | 2.636063000000  | -1.561266000000 |
| I  | 2.711509000000  | -0.253876000000 | -0.092116000000 |
| O  | 0.256690000000  | 1.907878000000  | 1.020900000000  |
| H  | 1.158148000000  | 2.052475000000  | 0.697638000000  |
| H  | -0.349268000000 | 2.432998000000  | 0.461595000000  |

**$n = 3$**

### **3.0.2**

|   |                 |                |                 |
|---|-----------------|----------------|-----------------|
| H | -0.210637000000 | 2.212773000000 | -1.231196000000 |
| H | 1.236978000000  | 1.736404000000 | -1.556183000000 |
| H | -1.963288000000 | 2.189653000000 | -0.023622000000 |
| H | -0.765519000000 | 2.476570000000 | 0.854935000000  |
| H | -0.655395000000 | 0.537200000000 | 1.886654000000  |
| H | 0.825200000000  | 0.874352000000 | 1.746261000000  |

|    |                 |                 |                 |
|----|-----------------|-----------------|-----------------|
| Li | 0.057754000000  | -0.150881000000 | -0.971629000000 |
| O  | 0.310914000000  | 1.601028000000  | -1.803379000000 |
| O  | -1.243453000000 | 2.834309000000  | 0.076946000000  |
| O  | -0.017325000000 | 1.249982000000  | 2.058928000000  |
| I  | -2.381699000000 | -0.646436000000 | -0.043611000000 |
| I  | 2.550724000000  | -0.392373000000 | 0.016783000000  |

### 3.2.1a

|    |                 |                 |                 |
|----|-----------------|-----------------|-----------------|
| Li | -0.812728000000 | -0.531035000000 | 1.292762000000  |
| O  | 0.155575000000  | -2.034998000000 | 0.552779000000  |
| H  | -0.307007000000 | -2.224392000000 | -0.274060000000 |
| H  | 1.035489000000  | -1.688376000000 | 0.276423000000  |
| O  | 0.337842000000  | 0.829245000000  | 2.029113000000  |
| H  | 1.250741000000  | 0.586237000000  | 1.781183000000  |
| H  | 0.157995000000  | 1.564801000000  | 1.402099000000  |
| O  | -0.030050000000 | 2.265089000000  | -0.303795000000 |
| H  | 0.715172000000  | 1.753395000000  | -0.664639000000 |
| H  | -0.826909000000 | 1.794474000000  | -0.602117000000 |
| I  | 2.863983000000  | -0.083118000000 | -0.248396000000 |
| I  | -2.926139000000 | -0.080424000000 | -0.204848000000 |

### 3.2.1b

|    |                 |                 |                 |
|----|-----------------|-----------------|-----------------|
| Li | -0.702909000000 | -0.526526000000 | 0.766749000000  |
| O  | 0.548307000000  | -1.930687000000 | 0.382580000000  |
| H  | 0.413295000000  | -2.486611000000 | -0.391838000000 |
| H  | 1.441280000000  | -1.524073000000 | 0.251866000000  |
| O  | 0.277409000000  | 1.036265000000  | 1.243136000000  |
| H  | 1.209755000000  | 0.982667000000  | 0.949800000000  |
| H  | -0.111670000000 | 1.822366000000  | 0.814724000000  |
| O  | -1.389051000000 | 2.780869000000  | -0.212618000000 |
| H  | -2.080373000000 | 2.092353000000  | -0.149659000000 |
| H  | -1.117342000000 | 2.734824000000  | -1.136519000000 |

|   |                 |                 |                 |
|---|-----------------|-----------------|-----------------|
| I | 3.318899000000  | -0.026201000000 | -0.152185000000 |
| I | -3.189456000000 | -0.297072000000 | -0.110898000000 |

### 3.2.1c

|    |                 |                 |                 |
|----|-----------------|-----------------|-----------------|
| Li | -0.680015000000 | -0.486813000000 | 0.528110000000  |
| O  | 0.638777000000  | -1.869367000000 | 0.388039000000  |
| H  | 0.613083000000  | -2.561186000000 | -0.280278000000 |
| H  | 1.531696000000  | -1.451637000000 | 0.289067000000  |
| O  | 0.255215000000  | 1.142570000000  | 0.777011000000  |
| H  | 1.197227000000  | 1.125290000000  | 0.514913000000  |
| H  | -0.171897000000 | 1.922177000000  | 0.378912000000  |
| O  | -1.741318000000 | 2.862499000000  | -0.208831000000 |
| H  | -2.238417000000 | 2.044633000000  | -0.409057000000 |
| H  | -2.197039000000 | 3.201850000000  | 0.569589000000  |
| I  | -3.254423000000 | -0.363502000000 | -0.082722000000 |
| I  | 3.444687000000  | -0.012089000000 | -0.111565000000 |

### 3.3.0a

|    |                 |                 |                 |
|----|-----------------|-----------------|-----------------|
| Li | -0.649710000000 | 0.920947000000  | 0.423203000000  |
| O  | -0.008253000000 | -0.510797000000 | 1.625143000000  |
| O  | 0.772298000000  | 2.340382000000  | 0.726130000000  |
| I  | -3.136871000000 | -0.181030000000 | -0.058592000000 |
| H  | -0.642865000000 | -1.214046000000 | 1.429845000000  |
| H  | 0.865609000000  | -0.806703000000 | 1.304188000000  |
| H  | 1.549355000000  | 1.746919000000  | 0.782173000000  |
| H  | 0.871860000000  | 2.723874000000  | -0.154512000000 |
| O  | -0.056177000000 | 0.669318000000  | -1.498678000000 |
| H  | 0.789278000000  | 0.182549000000  | -1.455546000000 |
| H  | -0.743594000000 | 0.045889000000  | -1.775979000000 |
| I  | 3.016051000000  | -0.298830000000 | -0.096512000000 |

### 3.3.0b

|    |                 |                |                 |
|----|-----------------|----------------|-----------------|
| Li | -0.777197000000 | 0.004342000000 | -0.004261000000 |
|----|-----------------|----------------|-----------------|

|   |                 |                 |                 |
|---|-----------------|-----------------|-----------------|
| O | 0.242058000000  | -1.250620000000 | 1.214468000000  |
| H | 0.067688000000  | -1.119571000000 | 2.152481000000  |
| H | 1.192741000000  | -1.054279000000 | 1.091441000000  |
| O | 0.246043000000  | -0.431684000000 | -1.696173000000 |
| H | 0.075037000000  | -1.316294000000 | -2.036448000000 |
| H | 1.195863000000  | -0.418273000000 | -1.461222000000 |
| I | -3.431111000000 | -0.000091000000 | 0.000961000000  |
| I | 3.292348000000  | -0.000498000000 | 0.001443000000  |
| O | 0.246648000000  | 1.685276000000  | 0.468489000000  |
| H | 1.196717000000  | 1.474489000000  | 0.365870000000  |
| H | 0.079974000000  | 2.428363000000  | -0.121004000000 |

## Benchmark of the Dispersion Corrected XC-Functionals for the AIMD simulations

DFT-based calculations have been done using FHI-Aims.<sup>[4-8]</sup> The WFT-based MP2 and CC calculations have been carried out using ORCA 4.0.1.2.<sup>[9,10]</sup> In the calculations scalar relativistic effects have been included using the ZORA.

The first task was the generation of a structure set representing the PES surface well enough, to determine the global minimum of the system. Therefore, an *ab initio* random structure search was done. Structures were generated and subsequently optimized using PBE<sup>[10]</sup> and the van-der-Waals Tkatchenko-Scheffler (vdW-TS) dispersion correction.<sup>[12]</sup> The Y-Li-X angle, the total energy, and the Li-X distances have been used to determine different minima on the PES. Using empirical cutoffs (changes in the internal coordinates or energy from one structure to another), a subset of structures was chosen to be compared in the benchmark. The geometries have been refined using MP2<sup>[13,14]</sup> with the ma-def2-TZVPP basis set.<sup>[15,16]</sup> The energies of the refined structures have then been calculated using the DLPNO-CCSD(T) method<sup>[17-22]</sup> at the ma-def2-SVP, ma-def2-TZVPP, and ma-def2-QZVPP levels to extrapolate the energy at the CBS-limit using Truhlar’s extrapolation scheme.<sup>[23]</sup> This consists of a separate extrapolation of the Hartree-Fock energy

$$E_{HF}^n = E_{HF}^{CBS} + Ae^{-\alpha\sqrt{n}} \quad (1)$$

with the fitted parameters  $E_{HF}^{CBS}$ ,  $A$  and  $\alpha$  and the correlation energy, according to

$$E_{corr}^n = E_{corr}^{CBS} + Bn^{-\beta}. \quad (2)$$

Here,  $B$ ,  $\beta$  and  $E_{corr}^n$  are parameters resulting from the least-squares fitting algorithm in a two-point extrapolation (using only the correlation energy at ma-def2-TZVPP and ma-def2-QZVPP), with  $\beta=3$ .

Since the gas phase cluster are expected to be weakly bound, a dispersion correction needs to be included and carefully chosen for these systems. The considered dispersion corrections are the vdW-TS dispersion correction and the many-body dispersion correction (MBD).<sup>[24,25]</sup> In order to choose the ideal pair of XC-functional and dispersion correction, the investigated clusters have been benchmarked and their relative energies, *i.e.*, their ordering, have been compared to the ordering in the reference method – DLPNO-CCSD(T) at CBS. The results are shown in boxplots in Figs. S11 – S13. In general, PBE0 performs better than PBE as expected. However, in the case of CII and Cl<sub>2</sub>, the performance of PBE is only slightly worse than PBE0, the influence of the dispersion correction is higher. For the CII and I<sub>2</sub> clusters, the many-body dispersion correction proves to give better results concerning the relative energies. This can be expected, since the interaction of iodine should be stronger influenced by dispersion effects, due to the larger polarizability and the weaker Li-I bond. For both clusters, the boxplot of PBE0-MBD is showing relatively small boxes close to  $\approx 10$  meV, which proves it to be the best method for these clusters. For Cl<sub>2</sub> the benchmark shows that the many-body dispersion (MBD) gives worse results than the vdW-TS correction. One might expect a certain overestimation of the dispersion interaction, since Li-Cl should have a bonding interaction, which is dominated by electrostatics, compared to iodine.



The most accurate results are seen for B3LYP-TS, with a small advantage over PBE0-TS. Interestingly, the performance of PBE and PBE0, both with the vdW-TS dispersion correction, is extremely similarly, so PBE-TS is probably the best choice for the AIMD simulation since it has a large cost advantage over B3LYP-TS and PBE0-TS.

In summary, the best combination of XC-functional and vdW correction, which gives overall good agreement in all clusters, is PBE0-TS. The MBD correction might be slightly better but had convergence problems in some of the AIMD simulations.

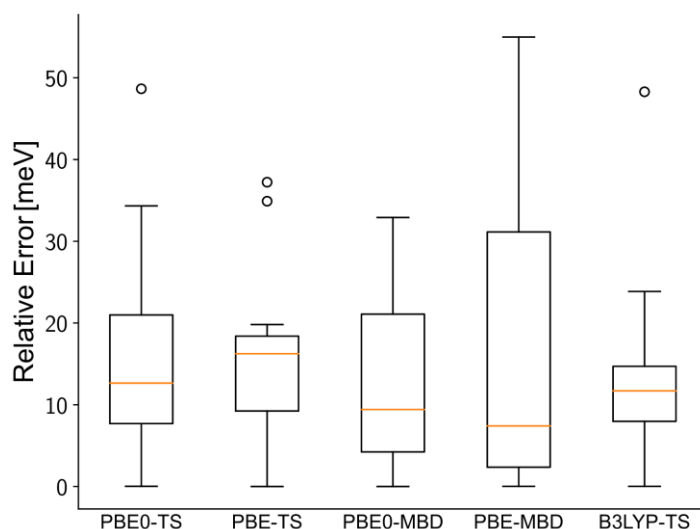

**Figure S16.**  $[\text{LiCl}_2(\text{H}_2\text{O})_3]^-$  Benchmark of the different combinations of XC-functional with the dispersion corrections: vdW and MBD.

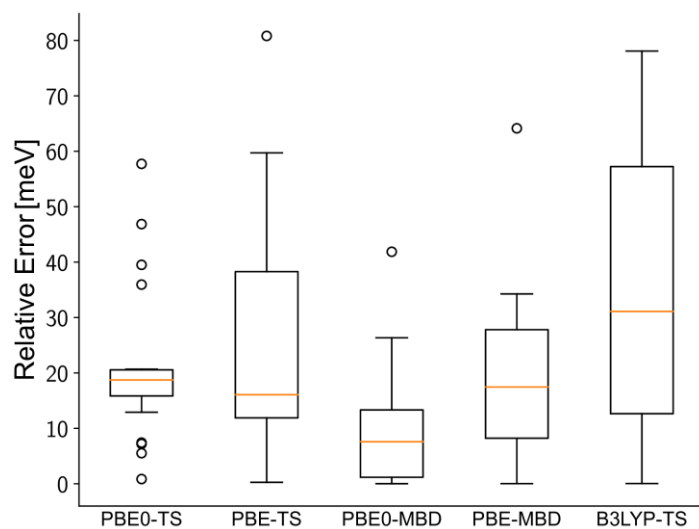

**Figure S17.**  $[\text{LiI}_2(\text{H}_2\text{O})_3]^-$  Benchmark of the different combinations of XC-functional with the dispersion corrections: vdW and MBD.

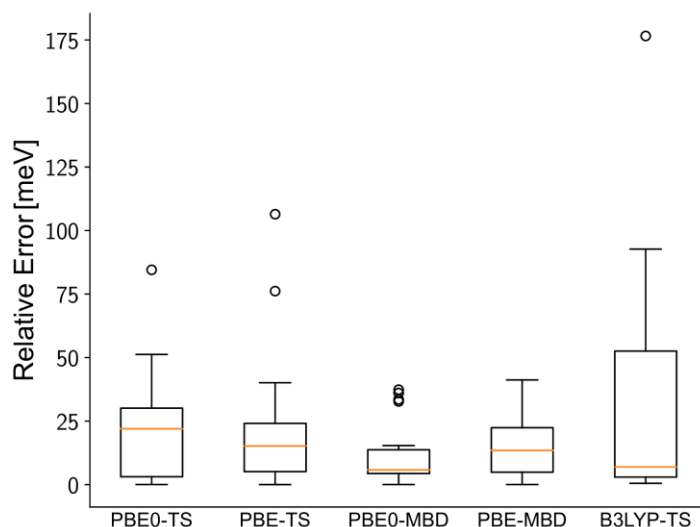

**Figure S18.**  $[\text{LiClI}(\text{H}_2\text{O})_3]^-$  Benchmark of the different combinations of XC-functional with the dispersion corrections: vdW and MBD.

## References

- [1] A. Chakraborty, S. Schmahl, K. R. Asmis, *Chemphyschem.* 2021, **22**, 1036.
- [2] P. Ayotte, G.H. Weddle and M.A. Johnson, *J. Chem. Phys.*, 1999, **110**, 7129-7132.
- [3] O. Rodriguez and J.M. Lisy, *J. Phys. Chem. Lett.*, 2011, **2**, 1444-1448.
- [4] V. Blum, R. Gehrke, F. Hanke, P. Havu, V. Havu, X. Ren, K. Reuter, M. Scheffler, *Comput. Phys. Commun.* 2009, **180**, 2175–2196.
- [5] A. C. Ihrig, J. Wieferink, I. Y. Zhang, M. Ropo, X. Ren, P. Rinke, M. Scheffler, V. Blum, *New J. Phys.* 2015, **17**, 093020.
- [6] V. Havu, V. Blum, P. Havu, M. Scheffler, *J. Comput. Phys.* 2009, **228**, 8367–8379.
- [7] V. W. Yu, F. Corsetti, A. García, W. P. Huhn, M. Jacquelin, W. Jia, B. Lange, L. Lin, J. Lu, W. Mi, A. Seifitokaldani, Á. Vázquez-Mayagoitia, C. Yang, H. Yang, V. Blum, *Comput. Phys. Commun.* 2018, **222**, 267–285.
- [8] A. Marek, V. Blum, R. Johanni, V. Havu, B. Lang, T. Auckenthaler, A. Heinecke, H.-J. Bungartz, H. Lederer, *J. Phys. Condens. Matter* 2014, **26**, 213201.
- [9] F. Neese, *WIREs Comput. Mol. Sci.* 2012, **2**, 73–78.
- [10] F. Neese, *WIREs Comput. Mol. Sci.* **2018**, **8**, e1327.
- [11] J. P. Perdew, K. Burke, M. Ernzerhof, *Phys. Rev. Lett.* 1996, **77**, 3865–3868.
- [12] A. Tkatchenko, M. Scheffler, *Phys. Rev. Lett.* 2009, **102**, 073005.
- [13] Chr. Møller, M. S. Plesset, *Phys. Rev.* 1934, **46**, 618–622.
- [14] M. Head-Gordon, J. A. Pople, M. J. Frisch, *Chem. Phys. Lett.* 1988, **153**, 503–506.

- [15] F. Weigend, R. Ahlrichs, *Phys. Chem. Chem. Phys.* 2005, **7**, 3297–3305.
- [16] J. Zheng, X. Xu, D. G. Truhlar, *Theor. Chem. Acc.* **2011**, *128*, 295–305.
- [17] K. Raghavachari, G. W. Trucks, J. A. Pople, M. Head-Gordon, *Chem. Phys. Lett.* **1989**, *157*, 479–483.
- [18] G. D. Purvis, R. J. Bartlett, *J. Chem. Phys.* **1982**, *76*, 1910–1918.
- [19] C. Riplinger, F. Neese, *J. Chem. Phys.* **2013**, *138*, 034106.
- [20] C. Riplinger, B. Sandhoefer, A. Hansen, F. Neese, *J. Chem. Phys.* **2013**, *139*, 134101.
- [21] J. Čížek, *J. Chem. Phys.* **1966**, *45*, 4256–4266.
- [22] O. Sinanoğlu, K. A. Brueckner, *Three Approaches to Electron Correlation in Atoms*, Yale University Press, New Haven, **1970**.
- [23] D. G. Truhlar, *Chem. Phys. Lett.* **1998**, *294*, 45–48.
- [24] A. Ambrosetti, A. M. Reilly, R. A. DiStasio, A. Tkatchenko, *J. Chem. Phys.* **2014**, *140*, 18A508.
- [25] A. Tkatchenko, R. A. DiStasio, R. Car, M. Scheffler, *Phys. Rev. Lett.* **2012**, *108*, 236402.
